# Supplementary material for: One pot synthesis of phenanthridines using a palladium-catalyzed cyclization of aromatic ketoximes with aryl iodides via Beckmann rearrangement
Source: Royal Society of Chemistry journal article supplement (doi:10.1039/c6ra07423e), 2016-01-01

# One pot synthesis of phenanthridines using a palladium - catalyzed cyclization of aromatic ketoximes with aryl iodides via Beckmann rearrangement

Gajula Raju<sup>a</sup>, Vijayacharan Guguloth<sup>a</sup> and Battu Satyanarayana<sup>a\*</sup>

<sup>a</sup> Department of Chemistry, University College of Science,  
Osmania University, Hyderabad, India 500 007.

E-mail: [satyambchem@yahoo.co.in](mailto:satyambchem@yahoo.co.in);

## Electronic Supplementary Information (ESI)

### Table of Contents

|                 |                                                                           |
|-----------------|---------------------------------------------------------------------------|
| Pages S2        | Experimental Section                                                      |
| Pages S3 – S10  | Spectral Data of all Compounds                                            |
| Pages S11 - S35 | Copies of <sup>1</sup> H and <sup>13</sup> C NMR Spectra of All Compounds |

## Experimental Section

### General procedure for the synthesis of phenanthridines to aromatic ketoximes with aryl iodides catalyzed by palladium catalyst.

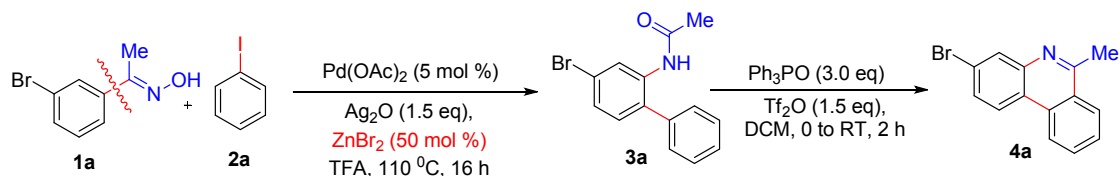

A 15-mL pressure tube equipped with a magnetic stirrer and septum containing  $\text{Pd}(\text{OAc})_2$  (0.05 mmol, 5 mol %),  $\text{Ag}_2\text{O}$  (1.50 mmol, 1.5 equiv) and  $\text{ZnBr}_2$  (0.5 mmol, 0.5 equiv) was evacuated and purged with nitrogen gas three times. To the tube were then added substituted oximes **1** (1.0 mmol), aryl iodides **2** (**2a-e** 3.0 mmol) and TFA solvent (2.0 mL) via syringes again the tube was evacuated and purged with nitrogen gas three times. Then, septum was taken out and covered with a screw cap immediately under nitrogen atmosphere and the reaction mixture was allowed to stir at  $110\text{ }^\circ\text{C}$  for 16 h. After cooling to ambient temperature, the reaction mixture was diluted with  $\text{CH}_2\text{Cl}_2$ , filtered through Celite and silica gel and the filtrate was concentrated. The crude residue was taken directly without column purification for next step.

### General procedure for the preparation of phenanthridines.

To a solution of  $\text{Ph}_3\text{PO}$  (3.0 equiv) in anhydrous  $\text{CH}_2\text{Cl}_2$  (5 mL) was added  $\text{Tf}_2\text{O}$  (0.078 mL, 1.5 equiv) drop wise under nitrogen atmosphere at  $0\text{ }^\circ\text{C}$ . After 15 min above crude product (arylated anilide) in anhyd  $\text{CH}_2\text{Cl}_2$  (2 mL) was added. The reaction was then warmed to r.t. and stirred until completion. The reaction was quenched by addition of sat. aq  $\text{NaHCO}_3$ . The mixture was extracted with  $\text{CH}_2\text{Cl}_2$  ( $3 \times 10\text{ mL}$ ). The combined extracts were washed with brine, dried over anhyd  $\text{Na}_2\text{SO}_4$ , and concentrated. The crude product was purified by column chromatography on silica gel using a mixture of PE and EtOAc (5:1 to 2:1, v/v) as the eluent to afford a pure product of **4a-4r**.

Spectral data and copies of  $^1\text{H}$  and  $^{13}\text{C}$  NMR spectra of all compounds **4a-r** and **3a-c** are listed below.

## Spectral Data of Compounds 4a-r and 3a-c.

**3-Bromo-6-methylphenanthridine (4a):**<sup>1</sup> Colorless solid; eluent (10% ethyl acetate in

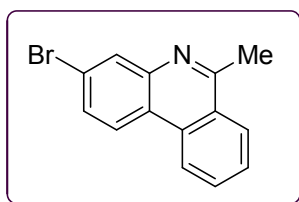

hexanes). <sup>1</sup>H NMR (CDCl<sub>3</sub>, 400 MHz): δ 8.54 (d, *J* = 8.0 Hz, 1 H), 8.34 (dd, *J* = 8.0, 4.0 Hz, 1 H), 8.26 (s, 1 H), 8.20 (d, *J* = 8.0 Hz, 1 H), 7.83 (t, *J* = 8.0 Hz, 1 H), 7.72- 7.66 (m, 2 H), 3.02 (s, 3 H). <sup>13</sup>C NMR (CDCl<sub>3</sub>, 100 MHz): δ 160.5, 144.5, 132.4, 131.9, 131.2, 129.8, 128.0, 126.9, 126.0, 123.7, 122.8, 122.5, 122.4, 23.5. HRMS (ESI): calc. for [(C<sub>14</sub>H<sub>10</sub>BrN)H] (M+H) 272.0075, measured 272.0078.

**3-Bromo-6,8-dimethylphenanthridine (4b):** Colorless solid; eluent (10% ethyl acetate in

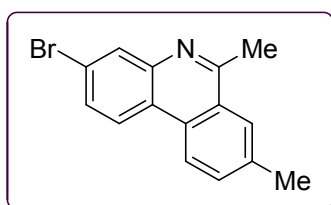

hexanes). <sup>1</sup>H NMR (CDCl<sub>3</sub>, 400 MHz): δ 8.44 (d, *J* = 8.0 Hz, 1 H), 8.32 (d, *J* = 8.0 Hz, 1 H), 8.26 (s, 1 H), 7.98 (s, 1 H), 7.68 (d, *J* = 8.0 Hz, 2 H), 3.02 (s, 3 H), 2.62 (s, 3 H). <sup>13</sup>C NMR (CDCl<sub>3</sub>, 100 MHz): δ 159.8, 144.1, 137.7, 132.5, 131.6, 129.8, 129.2, 126.1, 125.8, 123.2, 122.6, 121.9, 121.6, 23.3, 21.8. HRMS (ESI): calc. for [(C<sub>15</sub>H<sub>12</sub>BrN)H] (M+H) 286.0231, measured 286.0235.

**3-Bromo-8-methoxy-6-methylphenanthridine (4c):** Colorless solid; eluent (15% ethyl

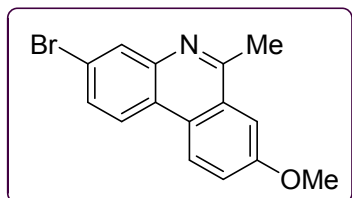

acetate in hexanes). <sup>1</sup>H NMR (CDCl<sub>3</sub>, 400 MHz): δ 8.42 (d, *J* = 8.0 Hz, 1 H), 8.25 (d, *J* = 8.0 Hz, 1 H), 8.23 (s, 1 H), 7.65 (d, *J* = 8.0 Hz, 1 H), 7.46 (s, 1 H), 7.45 (d, *J* = 8.0 Hz, 1 H), 3.99 (s, 3 H), 2.99 (s, 3 H). <sup>13</sup>C NMR (CDCl<sub>3</sub>, 100 MHz): δ 159.2, 158.9, 143.4, 131.5, 129.5, 127.1, 126.4, 123.9, 122.9, 122.6, 121.2, 121.1, 106.9, 55.6, 23.4. HRMS (ESI): calc. for [(C<sub>15</sub>H<sub>12</sub>BrNO)H] (M+H) 302.0181, measured 302.0184.

**3,8-Dibromo-6-methylphenanthridine (4d):** Colorless solid; eluent (10% ethyl acetate in

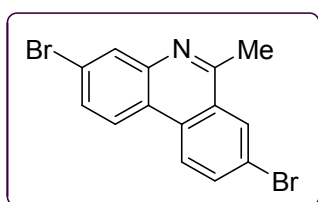

hexanes). <sup>1</sup>H NMR (CDCl<sub>3</sub>, 400 MHz): δ 8.42 (d, *J* = 8.0 Hz, 1 H), 8.35 (s, 1 H), 8.32 (d, *J* = 8.0 Hz, 1 H), 8.29 (s, 1 H), 7.94 (d, *J* = 8.0 Hz, 1 H), 7.72 (d, *J* = 8.0 Hz, 1 H), 3.02 (s, 3 H). <sup>13</sup>C NMR (CDCl<sub>3</sub>, 100 MHz): δ 159.0, 144.3, 134.1, 131.9, 130.8, 129.9, 129.3, 127.1, 124.1, 123.2, 122.8, 121.9, 121.7, 23.3. HRMS (ESI): calc. for [(C<sub>14</sub>H<sub>9</sub>Br<sub>2</sub>N)H] (M+H) 349.9180, measured 349.9183.

**Methyl 3-bromo-6-methylphenanthridine-8-carboxylate (4e):** Brown solid; eluent (15% ethyl acetate in hexanes).  $^1\text{H NMR}$  ( $\text{CDCl}_3$ , 400 MHz):  $\delta$  8.93

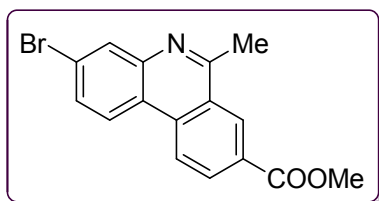

(s, 1 H), 8.62 (dd,  $J = 8.0, 4.0$  Hz, 1 H), 8.46 (d,  $J = 8.0, 4.0$  Hz, 1 H), 8.41 (d,  $J = 8.0$  Hz, 1 H), 8.31 (s, 1 H), 7.75 (dd,  $J = 8.0, 4.0$  Hz, 1 H), 4.05 (s, 3 H), 3.11 (s, 3 H).  $^{13}\text{C NMR}$  ( $\text{CDCl}_3$ , 100 MHz):  $\delta$  166.4, 160.7, 145.3, 135.2, 132.0, 130.7, 129.9, 128.99, 128.97, 125.3, 123.9, 123.7, 122.5, 121.9, 52.6, 23.4. **HRMS (ESI):** calc. for  $[(\text{C}_{16}\text{H}_{12}\text{BrNO}_2)\text{H}]$  (M+H) 330.0130, measured 330.0135.

**3-Methoxy-6-methylphenanthridine (4f):**<sup>2</sup> Colorless solid; eluent (15% ethyl acetate in

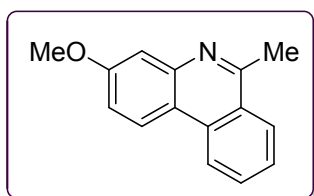

hexanes).  $^1\text{H NMR}$  ( $\text{CDCl}_3$ , 400 MHz):  $\delta$  8.47 (d,  $J = 8.0$  Hz, 1 H), 8.37 (d,  $J = 8.0$  Hz, 1 H), 8.15 (d,  $J = 8.0$  Hz, 1 H), 7.78 (t,  $J = 8.0$  Hz, 1 H), 7.59 (t,  $J = 8.0$  Hz, 1 H), 7.53 (s, 1 H), 7.24 (dd,  $J = 8.0, 4.0$  Hz, 1 H), 3.96 (s, 3 H), 3.02 (s, 3 H).  $^{13}\text{C NMR}$  ( $\text{CDCl}_3$ , 100 MHz):  $\delta$  160.1, 159.3, 144.8, 132.8, 130.7, 126.5, 126.2, 124.8, 123.1, 121.7, 117.7, 117.4, 108.9, 55.5, 23.0. **HRMS (ESI):** calc. for  $[(\text{C}_{15}\text{H}_{13}\text{NO})\text{H}]$  (M+H) 224.1075, measured 224.1080.

**4-Chloro-6,8-dimethylphenanthridine (4g):** Colorless solid; eluent (10% ethyl acetate in

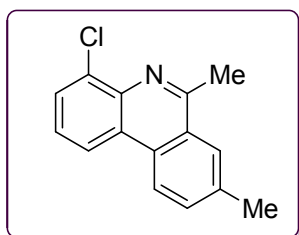

hexanes).  $^1\text{H NMR}$  ( $\text{CDCl}_3$ , 400 MHz):  $\delta$  8.48 (d,  $J = 8.0$  Hz, 1 H), 8.41 (dd,  $J = 8.0, 4.0$  Hz, 1 H), 8.02 (s, 1 H), 7.79 (dd,  $J = 8.0, 4.0$  Hz, 1 H), 7.71 (d,  $J = 8.0$  Hz, 1 H), 7.52 (t,  $J = 8.0$  Hz, 1 H), 3.13 (s, 3 H), 2.63 (s, 3 H).  $^{13}\text{C NMR}$  ( $\text{CDCl}_3$ , 100 MHz):  $\delta$  160.1, 138.6, 138.3, 133.2, 132.8, 130.3, 128.8, 126.4, 126.3, 125.9, 125.6, 122.5, 120.8, 23.2, 21.8. **HRMS (ESI):** calc. for  $[(\text{C}_{15}\text{H}_{12}\text{ClN})\text{H}]$  (M+H) 242.0737, measured 242.0738.

**6-Methylbenzo[c]phenanthridine (4h):**<sup>2</sup> Colorless solid; eluent (10% ethyl acetate in hexanes).  $^1\text{H NMR}$  ( $\text{CDCl}_3$ , 400 MHz):  $\delta$  9.48 (d,  $J = 8.0$  Hz, 1 H), 8.70 (d,  $J = 8.0$  Hz, 1 H), 8.53 (d,  $J = 8.0$  Hz, 1 H), 8.30 (d,  $J = 8.0$  Hz, 1 H), 7.98 (d,  $J = 8.0$  Hz, 2 H), 7.87 (t,  $J = 8.0$  Hz, 1 H), 7.79 – 7.67 (m, 3 H), 3.20 (s, 3 H).  $^{13}\text{C NMR}$  ( $\text{CDCl}_3$ , 100 MHz):  $\delta$  157.6, 140.4, 133.2, 132.8, 131.8, 130.1, 127.5, 127.1, 126.84, 126.81, 126.7, 126.4, 126.1, 124.7, 122.6,

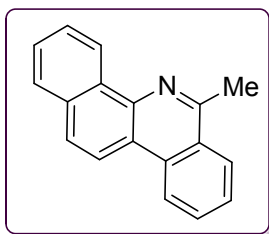

120.3, 119.8, 23.6. **HRMS (ESI):** calc. for [(C<sub>18</sub>H<sub>13</sub>N)H] (M+H) 244.1126, measured 244.1129.

**2,3-Dimethoxy-6-methylphenanthridine (4i):** Colorless solid; eluent (20% ethyl acetate in

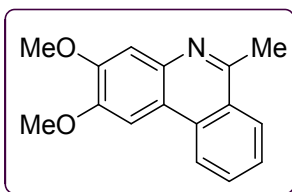

hexanes). **<sup>1</sup>H NMR (CDCl<sub>3</sub>, 400 MHz):** δ 8.46 (d, *J* = 8.2 Hz, 1 H), 8.19 (d, *J* = 8.2 Hz, 1 H), 7.81 (s, 1 H), 7.80 (t, *J* = 8.0 Hz, 1 H), 7.63 (t, *J* = 8.0 Hz, 1 H), 7.55 (s, 1 H), 4.11 (s, 3 H), 4.05 (s, 3 H), 3.03 (s, 3 H). **<sup>13</sup>C NMR (CDCl<sub>3</sub>, 100 MHz):** δ 156.7, 150.9, 148.9, 132.3,

130.3, 129.5, 126.7, 126.3, 125.0, 121.8, 117.8, 109.2, 101.7, 56.1, 22.8. **HRMS (ESI):** calc. for [(C<sub>16</sub>H<sub>15</sub>NO<sub>2</sub>)H] (M+H) 254.1181, measured 254.1187.

**2-Chloro-6-methylphenanthridine(4ja):**<sup>3</sup> Colorless solid; eluent (10% ethyl acetate in

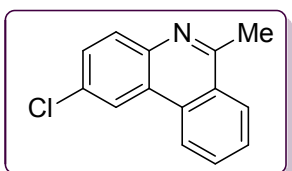

hexanes). **<sup>1</sup>H NMR (CDCl<sub>3</sub>, 400 MHz):** δ 8.53 (d, *J* = 8.0 Hz, 1 H), 8.47 (s, 1 H), 8.23 (d, *J* = 8.0 Hz, 1 H), 8.04 (d, *J* = 8.0 Hz, 1 H), 7.87 (t, *J* = 8.0 Hz, 1 H), 7.74 (t, *J* = 8.0 Hz, 1 H), 7.64 (dd, *J* = 8.0, 4.0, Hz, 1 H), 3.04 (s, 3 H). **<sup>13</sup>C NMR (CDCl<sub>3</sub>, 100 MHz):** δ 159.2, 141.8,

132.2, 131.5, 130.8, 130.6, 129.1, 128.0, 126.6, 125.9, 124.8, 122.3, 121.6, 23.23. **HRMS (ESI):** calc. for [(C<sub>14</sub>H<sub>10</sub>ClN)H] (M+H) 228.0580, measured 228.0584.

**2-Chloro-6-methyl-4-phenylphenanthridine (4jb):** Colorless solid; eluent (10% ethyl

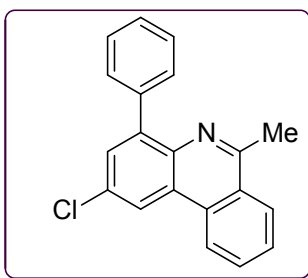

acetate in hexanes). **<sup>1</sup>H NMR (CDCl<sub>3</sub>, 400 MHz):** δ 8.58 (d, *J* = 8.0 Hz, 1 H), 8.50 (s, 1 H), 8.21 (d, *J* = 8.0 Hz, 1 H), 7.86 (t, *J* = 8.0, Hz, 1 H), 7.78 – 7.72 (m, 4 H), 7.52 (t, *J* = 8.0, Hz, 2 H), 7.45 (t, *J* = 8.0, Hz, 1 H), 2.97 (s, 3 H). **<sup>13</sup>C NMR (CDCl<sub>3</sub>, 100 MHz):** δ 158.4, 142.3, 139.4, 138.7, 131.7, 131.6, 131.0, 130.5, 130.0, 127.9, 127.8, 127.5, 126.4, 125.7, 125.4, 122.6, 120.8, 23.6. **HRMS (ESI):** calc.

for [(C<sub>20</sub>H<sub>14</sub>ClN)H] (M+H) 304.0893, measured 304.0895.

**2,8-Dimethoxy-6-methylphenanthridine (4ka):**<sup>4</sup> Colorless solid; eluent (20% ethyl acetate

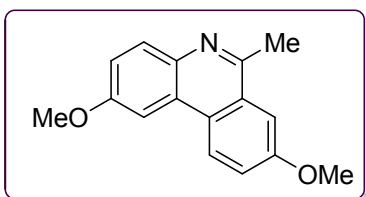

in hexanes). **<sup>1</sup>H NMR (CDCl<sub>3</sub>, 400 MHz):** δ 8.40 (d, *J* = 8.0, Hz, 1 H), 8.00 (dd, *J* = 8.0, 4.0 Hz, 1 H) 7.74 (s, 1 H), 7.42 (s, 1 H), 7.40 (d, *J* = 8.0, Hz, 1 H), 7.28 - 7.25 (m, 1 H), 3.98 (s, 6 H), 2.96 (s, 3 H). **<sup>13</sup>C NMR (CDCl<sub>3</sub>, 100 MHz):** δ 158.6, 158.0,

155.2, 137.7, 130.3, 127.2, 126.4, 124.8, 123.9, 120.5, 117.4, 106.6, 102.4, 55.5, 55.4, 22.9.

**HRMS (ESI):** calc. for  $[(C_{16}H_{15}NO_2)H]$  (M+H) 254.1181, measured 254.1184.

**2,8-Dimethoxy-4-(4-methoxyphenyl)-6-methylphenanthridine (4kb): HRMS (ESI):** calc. for  $[(C_{23}H_{21}NO_3)H]$  (M+H) 360.1600, measured 360.1604.

**2-Methoxy-6,8-dimethylphenanthridine (4la):** Colorless solid; eluent (15% ethyl acetate in

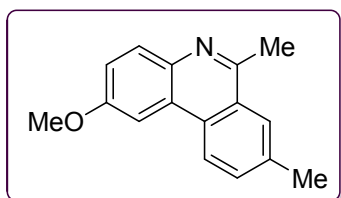

hexanes).  **$^1H$  NMR (CDCl<sub>3</sub>, 400 MHz):**  $\delta$  8.43 (d,  $J = 8.0$ , Hz, 1 H), 8.02 (d,  $J = 8.0$ , Hz, 1 H), 7.96 (s, 1 H), 7.84 (s, 1 H), 7.64 (d,  $J = 8.0$ , Hz, 1 H), 7.31 (dd,  $J = 8.0, 4.0$ , Hz, 1 H), 4.00 (s, 3 H), 3.00 (s, 3 H), 2.61 (s, 3 H).  **$^{13}C$  NMR (CDCl<sub>3</sub>, 100 MHz):**  $\delta$  157.9, 155.9, 138.3, 137.3, 131.9, 130.4, 129.9, 126.1, 124.8, 122.2, 117.8, 102.9, 55.6, 23.0, 21.8. **HRMS (ESI):** calc. for  $[(C_{16}H_{15}NO)H]$  (M+H) 238.1232, measured 238.1233.

**2-Methoxy-6,8-dimethyl-4-(p-tolyl)phenanthridine (4lb):** Colorless solid; eluent (15%

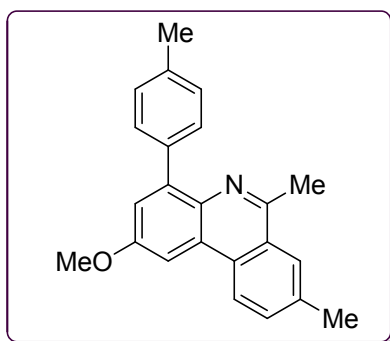

ethyl acetate in hexanes).  **$^1H$  NMR (CDCl<sub>3</sub>, 400 MHz):**  $\delta$  8.48 (dd,  $J = 8.0, 4.0$  Hz, 1 H), 7.96 (s, 1 H), 7.88 (t,  $J = 8.0$  Hz, 1 H), 7.70 (dd,  $J = 8.0, 4.0$ , Hz, 2 H), 7.65 (d,  $J = 8.0$ , Hz, 1 H), 7.37 (t,  $J = 8.0$ , Hz, 1 H), 7.32 (d,  $J = 8.0$ , Hz, 2 H), 4.04 (s, 3 H), 2.93 (s, 3 H), 2.62 (s, 3 H), 2.46 (s, 3 H).  **$^{13}C$  NMR (CDCl<sub>3</sub>, 100 MHz):**  $\delta$  157.2, 155.1, 141.9, 137.2, 136.8, 136.1, 131.5, 130.9, 130.1, 128.4, 125.9, 125.4, 122.5, 118.6, 102.3, 55.6, 23.5, 21.8, 21.3. **HRMS (ESI):** calc. for  $[(C_{23}H_{21}NO)H]$  (M+H) 328.1701, measured 32.1703.

**2,6-Dimethylphenanthridine (4ma):**<sup>3</sup> Colorless solid; eluent (10% ethyl acetate in hexanes).

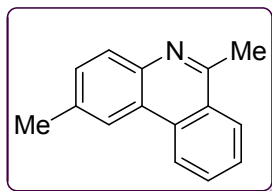

**$^1H$  NMR (CDCl<sub>3</sub>, 400 MHz):**  $\delta$  8.60 (d,  $J = 8.0$  Hz, 1 H), 8.30 (s, 1 H), 8.19 (d,  $J = 8.0$  Hz, 1 H), 8.00 (d,  $J = 8.0$  Hz, 1 H), 7.81 (t,  $J = 8.0$  Hz, 1 H), 7.67 (t,  $J = 8.0$  Hz, 1 H), 7.53 (dd,  $J = 8.0, 4.0$  Hz, 1 H), 3.03 (s, 3 H), 2.61 (s, 3 H).  **$^{13}C$  NMR (CDCl<sub>3</sub>, 100 MHz):**  $\delta$  157.7, 141.8, 136.0, 132.25, 130.24, 130.2, 128.9, 127.0, 126.4, 125.7, 123.5, 122.2, 121.5, 23.2, 21.8. **HRMS (ESI):** calc. for  $[(C_{15}H_{13}N)H]$  (M+H) 208.1126, measured 208.1128.

**2,6-Dimethyl-4-phenylphenanthridine (4mb): HRMS (ESI):** calc. for  $[(C_{21}H_{17}N)H]$  (M+H) 284.1439, measured 284.1432.

**6-Methylphenanthridine (4na):**<sup>4</sup> Colorless solid; eluent (10% ethyl acetate in hexanes). <sup>1</sup>H

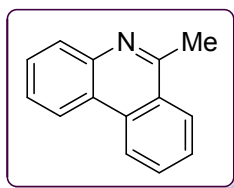

**NMR (CDCl<sub>3</sub>, 400 MHz):**  $\delta$  8.62 (d,  $J$  = 8.0 Hz, 1 H), 8.54 (d,  $J$  = 8.0 Hz, 1 H), 8.22 (d,  $J$  = 8.0 Hz, 1 H), 8.13 (d,  $J$  = 8.0 Hz, 1 H), 7.85 (t,  $J$  = 8.0 Hz, 1 H), 7.74 – 7.68 (m, 2 H), 7.63 (t,  $J$  = 8.0 Hz, 1 H), 3.06 (s, 3 H). <sup>13</sup>C

**NMR (CDCl<sub>3</sub>, 100 MHz):**  $\delta$  158.9, 143.4, 132.5, 130.6, 129.1, 128.7, 127.3, 126.6, 126.4, 125.8, 123.7, 122.3, 121.9, 23.2. **HRMS (ESI):** calc. for [(C<sub>14</sub>H<sub>11</sub>N)H] (M+H) 194.0970, measured 194.0972.

**6-Methyl-4-phenylphenanthridine (4nb):** **HRMS (ESI):** calc. for [(C<sub>20</sub>H<sub>15</sub>N)H] (M+H) 270.1283, measured 270.1286.

**6-Ethyl-8-methylphenanthridine (4oa):** Colorless solid; eluent (10% ethyl acetate in

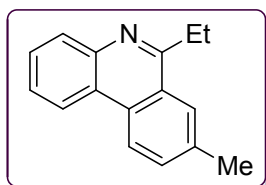

hexanes). <sup>1</sup>H NMR (CDCl<sub>3</sub>, 400 MHz):  $\delta$  8.64 (d,  $J$  = 8.0 Hz, 1 H), 8.58 (d,  $J$  = 8.0 Hz, 1 H), 8.51 (d,  $J$  = 8.0 Hz, 1 H), 8.18 (s, 1 H), 7.94 (d,  $J$  = 8.0 Hz, 1 H), 7.84 – 7.78 (m, 2 H), 3.72 (q,  $J$  = 8.0 Hz, 2 H), 2.69 (s, 3 H), 1.59 (t,  $J$  = 8.0 Hz, 3 H). <sup>13</sup>C NMR (CDCl<sub>3</sub>, 100 MHz):

$\delta$  163.3, 137.8, 133.2, 131.2, 129.4, 128.7, 127.9, 126.9, 126.1, 124.7, 123.8, 122.5, 121.8, 28.4, 21.8, 13.9. **HRMS (ESI):** calc. for [(C<sub>16</sub>H<sub>15</sub>N)H] (M+H) 222.1283, measured 222.1286.

**6-Ethyl-8-methyl-4-(*p*-tolyl)phenanthridine (4ob):** Colorless solid; eluent (10% ethyl

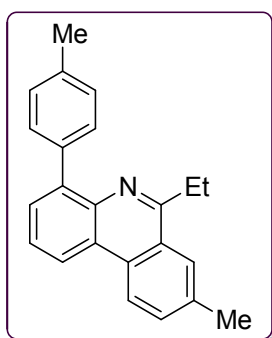

acetate in hexanes). <sup>1</sup>H NMR (CDCl<sub>3</sub>, 400 MHz):  $\delta$  8.58 (d,  $J$  = 8.0 Hz, 1 H), 7.52 (d,  $J$  = 8.0 Hz, 1 H), 8.04 (s, 1 H), 7.77 (t,  $J$  = 8.0 Hz, 3 H), 7.65 (t,  $J$  = 8.0 Hz, 2 H), 7.33 (d,  $J$  = 8.0 Hz, 2 H), 3.37 (q,  $J$  = 8.0 Hz, 2 H), 2.63 (s, 3 H), 2.49 (s, 3 H), 1.46 (t,  $J$  = 8.0 Hz, 3 H). <sup>13</sup>C NMR (CDCl<sub>3</sub>, 100 MHz):  $\delta$  161.2, 140.6, 137.2, 137.0, 136.5, 131.7, 131.2, 130.8, 129.2, 128.3, 125.8, 125.2, 125.1, 124.1, 122.6, 120.9, 28.6, 21.9, 21.3, 12.2. **HRMS (ESI):** calc. for [(C<sub>23</sub>H<sub>21</sub>N)H] (M+H)

312.1752, measured 312.1755.

**6-Isopropylphenanthridine (4pa):**<sup>3</sup> Colorless semisolid; eluent (10% ethyl acetate in hexanes). <sup>1</sup>H NMR (CDCl<sub>3</sub>, 400 MHz): δ 8.67 (d, *J* = 8.0 Hz, 1 H),

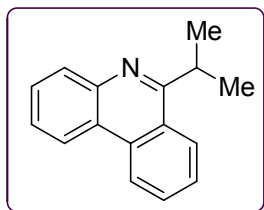

8.55 (d, *J* = 8.0 Hz, 1 H), 8.34 (d, *J* = 8.0 Hz, 1 H), 8.20 (d, *J* = 8.0 Hz, 1 H), 7.84 (t, *J* = 8.0 Hz, 1 H), 7.74 – 7.69 (m, 2 H), 7.63 (t, *J* = 8.0 Hz, 1 H), 4.03 (sept, *J* = 4.0 Hz, 1 H), 1.56 (d, *J* = 4.0 Hz, 6 H). <sup>13</sup>C NMR (CDCl<sub>3</sub>, 100 MHz): δ 165.9, 143.5, 133.1, 130.1, 129.7, 128.5, 127.1,

126.2, 125.7, 124.6, 123.4, 122.6, 121.8, 31.5, 21.9. HRMS (ESI): calc. for [(C<sub>16</sub>H<sub>15</sub>N)H] (M+H) 222.1283, measured 222.1285.

**6-Isopropyl-4-phenylphenanthridine (4pb):** HRMS (ESI): calc. for [(C<sub>22</sub>H<sub>19</sub>N)H] (M+H) 298.1596, measured 298.1591.

**3-Bromo-6,9-dimethylphenanthridine (4qa):** Colorless solid; eluent (10% ethyl acetate in

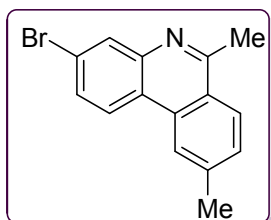

hexanes). <sup>1</sup>H NMR (CDCl<sub>3</sub>, 400 MHz): δ 8.37 (d, *J* = 8.0 Hz, 1 H), 8.35 (s, 1 H), 8.29 (s, 1 H), 8.12 (d, *J* = 8.0 Hz, 1 H), 7.69 (dd, *J* = 8.0, 4.0, Hz, 1 H), 7.55 (d, *J* = 8.0 Hz, 1 H), 3.03 (s, 3 H), 2.66 (s, 3 H). <sup>13</sup>C NMR (CDCl<sub>3</sub>, 100 MHz): δ 160.1, 144.1, 141.7, 132.3, 131.3, 129.5, 129.4, 126.7, 123.8, 123.4, 122.5, 122.3, 121.9, 22.9, 22.2. HRMS

(ESI): calc. for [(C<sub>15</sub>H<sub>12</sub>BrN)H] (M+H) 286.0231, measured 286.0235.

**3-Bromo-6,7-dimethylphenanthridine (4qb):** (ESI): calc. for [(C<sub>15</sub>H<sub>12</sub>BrN)H] (M+H) 286.0231, measured 286.0235.

**3-Bromo-9-fluoro-6-methylphenanthridine (4ra):** Colorless solid; eluent (10% ethyl

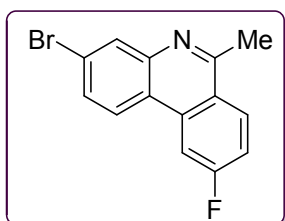

acetate in hexanes). <sup>1</sup>H NMR (CDCl<sub>3</sub>, 400 MHz): δ 8.26 (s, 1 H), 8.23 (d, *J* = 8.0 Hz, 1 H), 8.12 (d, *J* = 8.0 Hz, 2 H), 7.70 (d, *J* = 8.0 Hz, 1 H), 7.44 (t, *J* = 8.0 Hz, 1 H), 3.02 (s, 3 H). <sup>13</sup>C NMR (CDCl<sub>3</sub>, 100 MHz): δ 165.1, 162.6, 159.5, 144.8, 134.5, 134.4(F-coupling), 131.9, 129.6, 129.5(F-coupling), 123.5, 123.0, 122.7, 122.1,

122.1(F-coupling), 116.7, 116.5(F-coupling), 107.4, 107.2(F-coupling), 23.4. HRMS (ESI): calc. for [(C<sub>14</sub>H<sub>9</sub>BrFN)H] (M+H) 289.9981, measured 289.9983.



**3-Bromo-7-fluoro-6-methylphenanthridine (4rb):** Colorless solid; eluent (10% ethyl

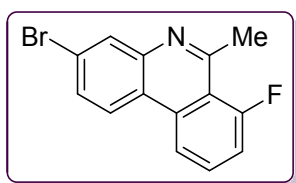

acetate in hexanes).  $^1\text{H NMR}$  ( $\text{CDCl}_3$ , 400 MHz):  $\delta$  8.36 (d,  $J = 8.0$  Hz, 1 H), 8.33 (d,  $J = 8.0$  Hz, 1 H), 8.29 (s, 1 H), 7.70 (td,  $J = 8.0, 4.0$  Hz, 1 H), 7.72 (d,  $J = 8.0$  Hz, 1 H), 7.38 (dd,  $J = 12.0, 8.0$  Hz, 1 H due to F-coupling), 3.15 (d,  $J = 8.0$  Hz, 3 H due to F-coupling).

**HRMS (ESI):** calc. for  $[(\text{C}_{14}\text{H}_9\text{BrFN})\text{H}]$  (M+H) 289.9981, measured 289.9983.

**N-(4-Bromo-[1,1'-biphenyl]-2-yl)acetamide (3a):** Colorless solid; eluent (25% ethyl acetate

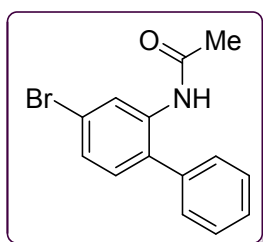

in hexanes).  $^1\text{H NMR}$  ( $\text{CDCl}_3$ , 400 MHz):  $\delta$  8.53 (s, 1 H), 7.50 (t,  $J = 8.0$  Hz, 2 H), 7.44 (t,  $J = 8.0$  Hz, 1 H), 7.34 (d,  $J = 8.0$  Hz, 2 H), 7.30 (d,  $J = 8.0$  Hz, 1 H), 7.17 (s, 1 H), 7.10 (d,  $J = 8.0$  Hz, 1 H), 2.02 (s, 3 H).

$^{13}\text{C NMR}$  ( $\text{CDCl}_3$ , 100 MHz):  $\delta$  168.2, 137.0, 135.8, 131.1, 130.6, 129.2, 129.0, 128.3, 127.2, 124.0, 122.0, 24.6. **HRMS (ESI):** calc. for

$[(\text{C}_{14}\text{H}_{12}\text{BrNO})\text{H}]$  (M+H) 290.0181, measured 290.0182.

**N-(5-Methoxy-[1,1'-biphenyl]-2-yl)acetamide (3b):** Colorless solid; eluent (35% ethyl

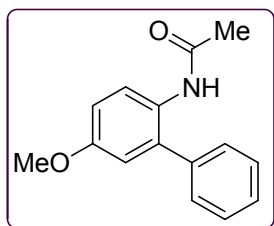

acetate in hexanes).  $^1\text{H NMR}$  ( $\text{CDCl}_3$ , 400 MHz):  $\delta$  8.00 (d,  $J = 8.0$  Hz, 1 H), 7.48 (t,  $J = 8.0$  Hz, 2 H), 7.42 (d,  $J = 8.0$  Hz, 1 H), 7.37 (d,  $J = 8.0$  Hz, 2 H), 6.98 (bs, 1 H), 6.91 (dd,  $J = 8.0, 4.0$  Hz, 1 H), 6.81 (s, 1 H), 3.81 (s, 3 H), 2.00 (s, 3 H).  $^{13}\text{C NMR}$  ( $\text{CDCl}_3$ , 100 MHz):  $\delta$

168.4, 156.4, 138.2, 134.7, 129.0, 128.9, 127.9, 127.6, 124.3, 115.4,

113.4, 55.5, 24.2. **HRMS (ESI):** calc. for  $[(\text{C}_{15}\text{H}_{15}\text{NO}_2)\text{H}]$  (M+H) 242.1181, measured 242.1184.

**N-(5-Methyl-[1,1'-biphenyl]-2-yl)acetamide (3c):** Colorless solid; eluent (25% ethyl acetate

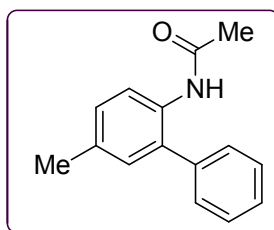

in hexanes).  $^1\text{H NMR}$  ( $\text{CDCl}_3$ , 400 MHz):  $\delta$  8.09 (d,  $J = 8.0$  Hz, 1 H), 7.48 (t,  $J = 8.0$  Hz, 2 H), 7.42 (d,  $J = 8.0$  Hz, 1 H), 7.37 (d,  $J = 8.0$  Hz, 2 H), 7.18 (d,  $J = 8.0$  Hz, 1 H), 7.07 (s, 2 H), 2.36 (s, 3 H), 2.02 (s, 3 H).

$^{13}\text{C NMR}$  ( $\text{CDCl}_3$ , 100 MHz):  $\delta$  168.3, 138.3, 134.1, 132.5, 132.0, 130.6, 129.1, 128.9, 128.9, 127.8, 122.0, 24.4, 20.8. **HRMS (ESI):**

calc. for  $[(\text{C}_{15}\text{H}_{15}\text{NO})\text{H}]$  (M+H) 226.1232, measured 226.1235.

## References

1. R. K. Chinnagolla and J. Masilamani, *Chem. Commun.*, 2014, **50**, 2442-2444.
2. J. Heng, A. Xiaode, T. Kun, Z. Tianyi, Z. Yan and Y. Shouyun, *Angew. Chem. Int. Ed.*, 2015, **54**, 4055-4059.
3. R. Mani and L. Shih-Tzung, *J. Org. Chem.*, 2015, **80**, 5329-5336.
4. X. Jie, D. Qing-Li, L. Guan-Sai, W. Shaozhong, C. Lin and Y. Zhu-Jun, *SYNLETT* 2010, **11**, 1674-1678.

# $^1\text{H}$ , $^{13}\text{C}$ and DEPT NMR Spectra's of compound of 4a.

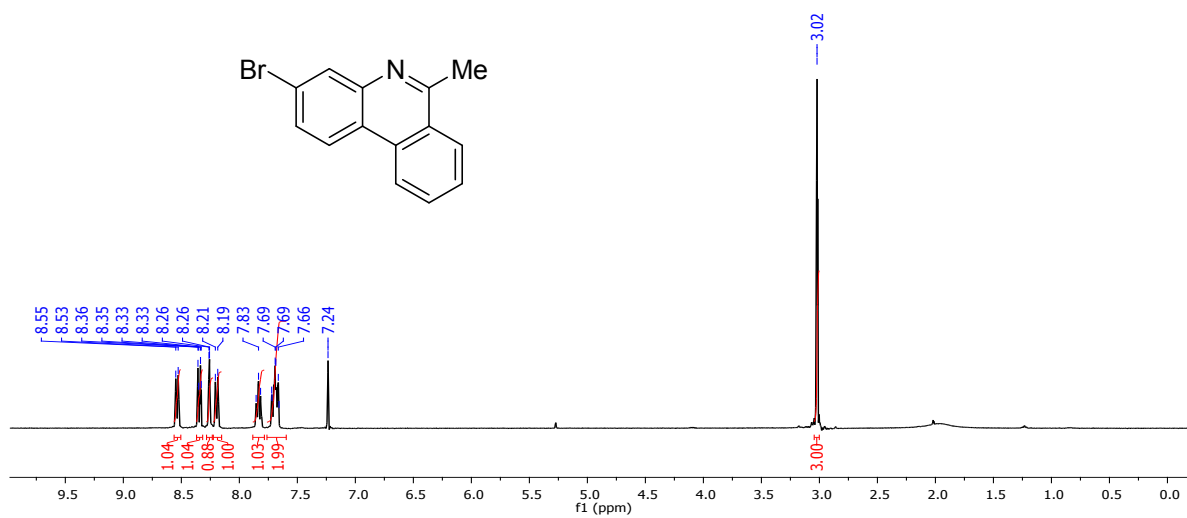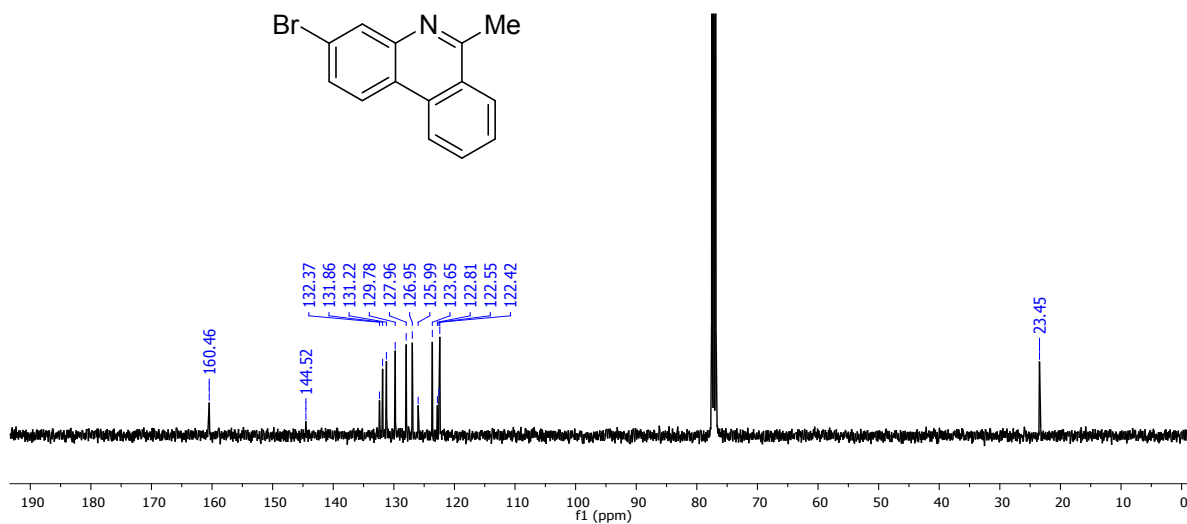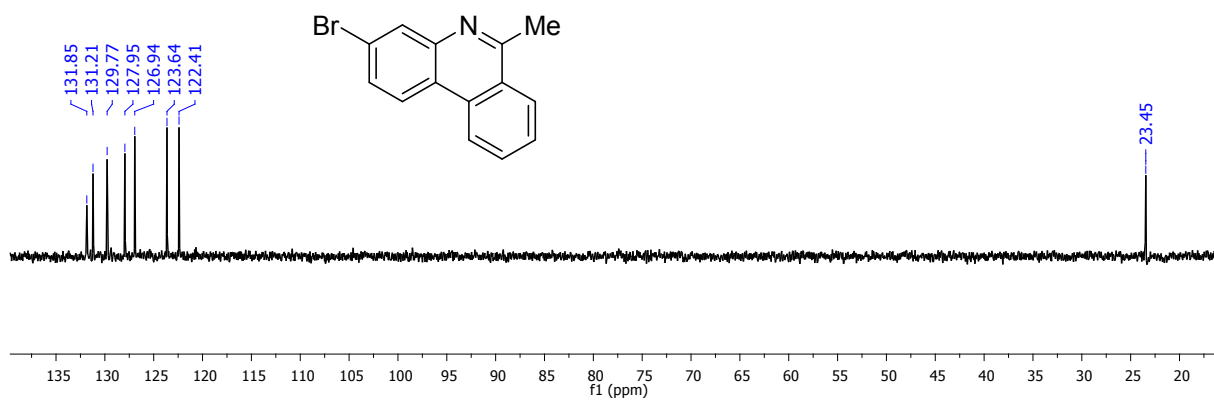

# $H^1, C^{13}$ and DEPT NMR Spectra's of compound of 4b.

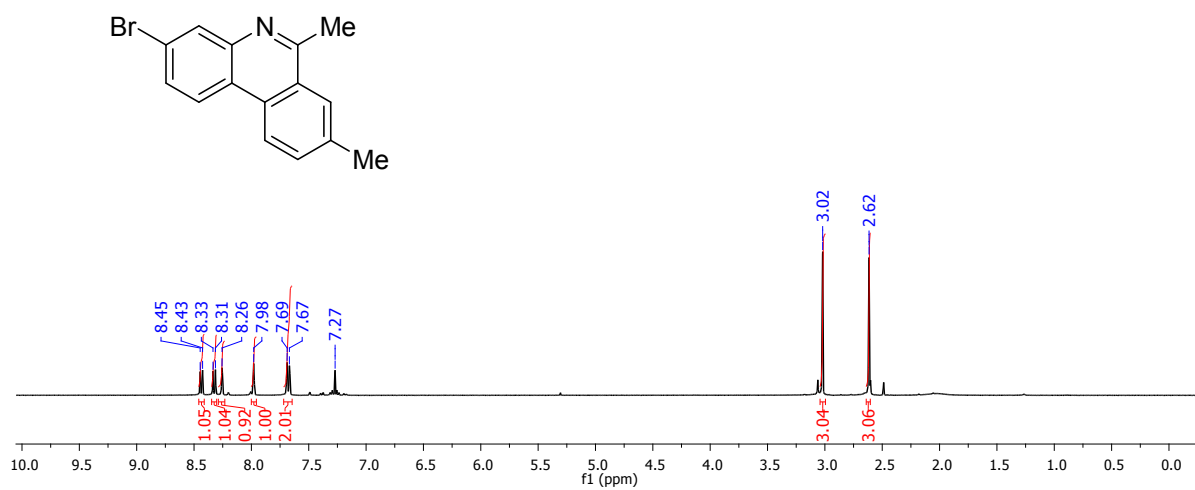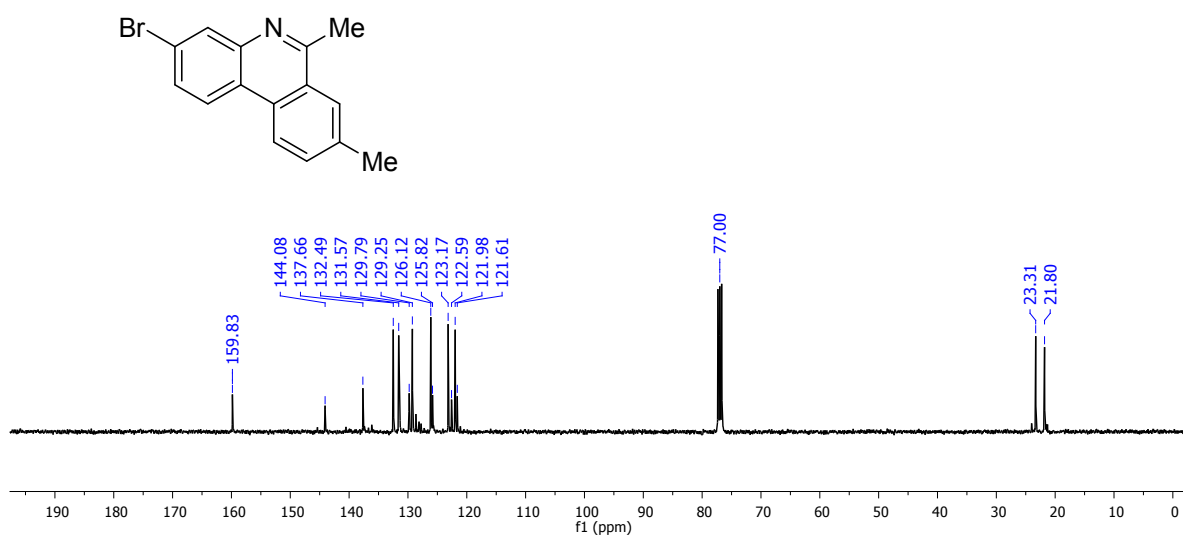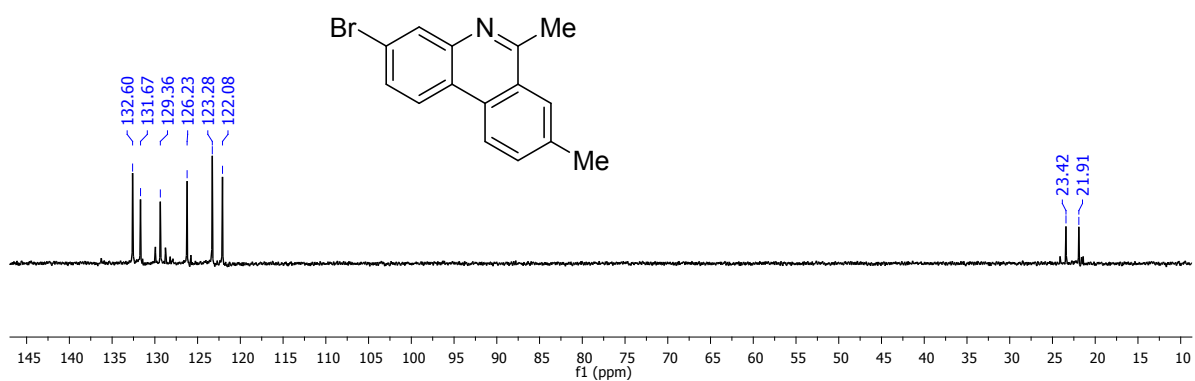

# $^1\text{H}$ , $^{13}\text{C}$ and DEPT NMR Spectra's of compound of 4c.

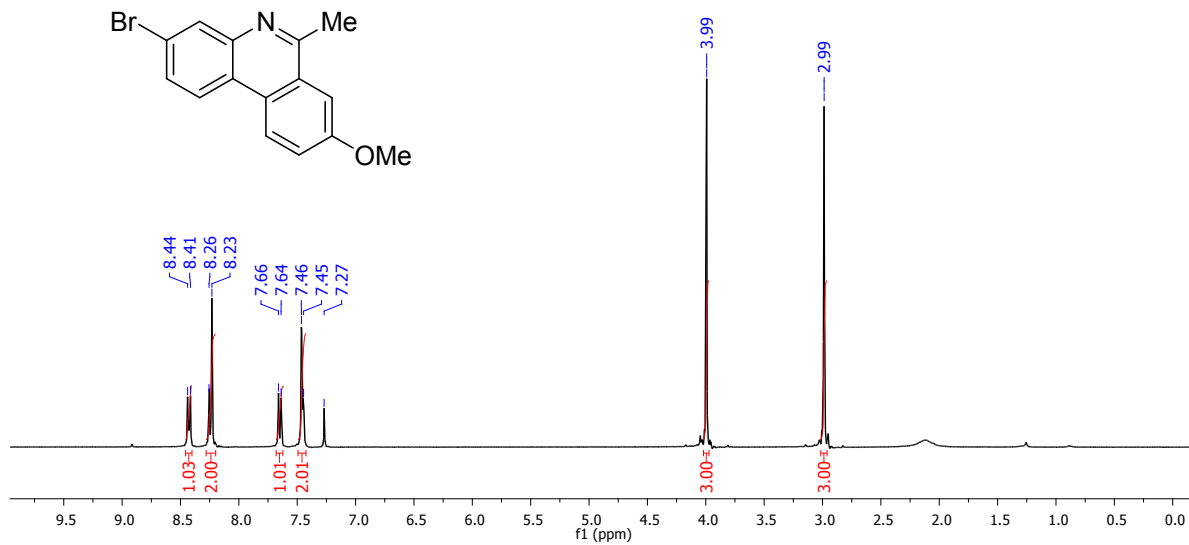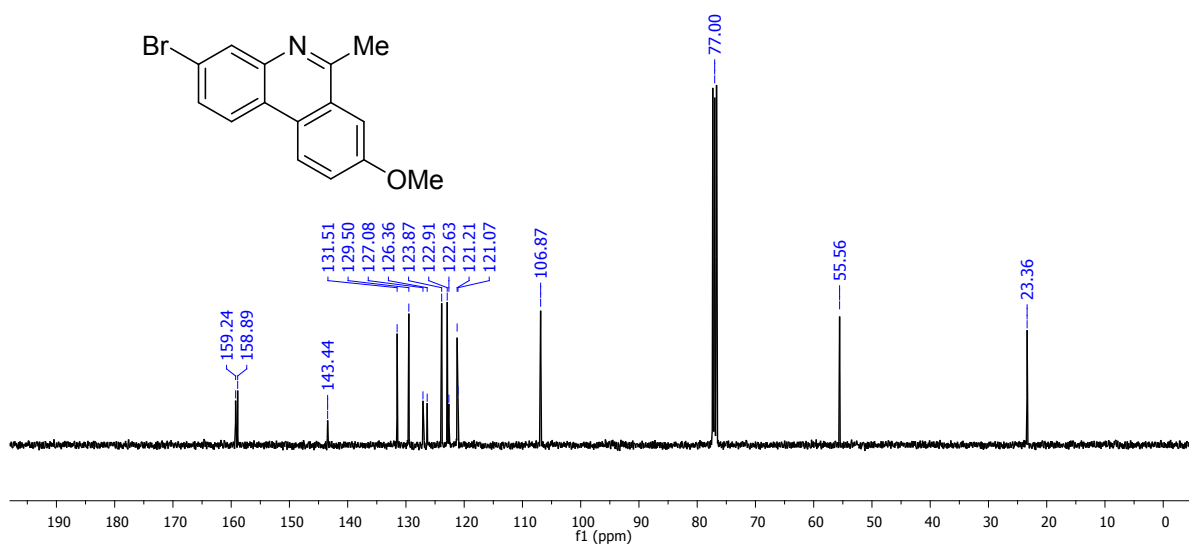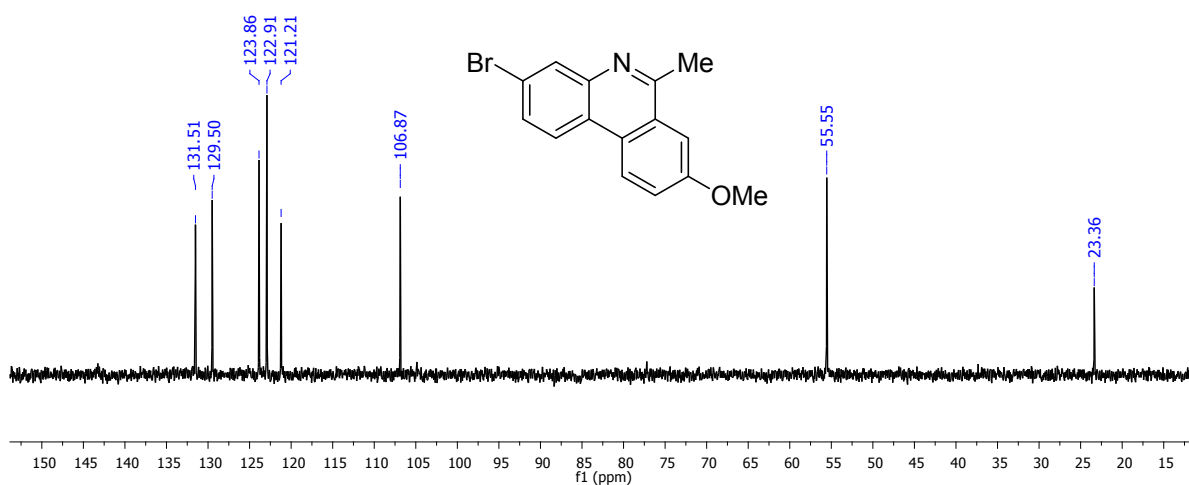

# $^1\text{H}$ , $^{13}\text{C}$ and DEPT NMR Spectra's of compound of 4d.

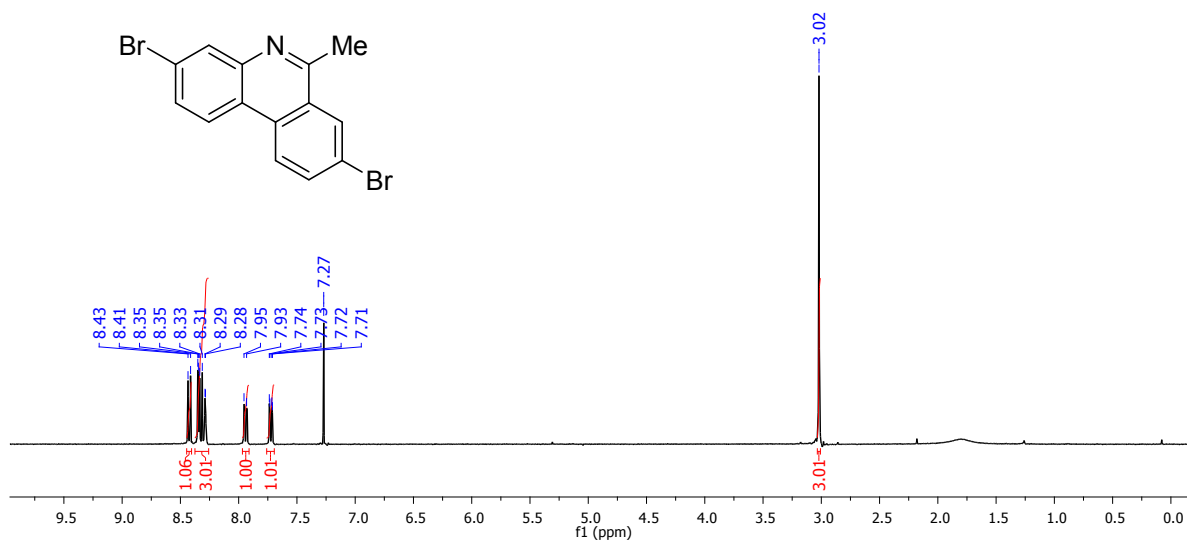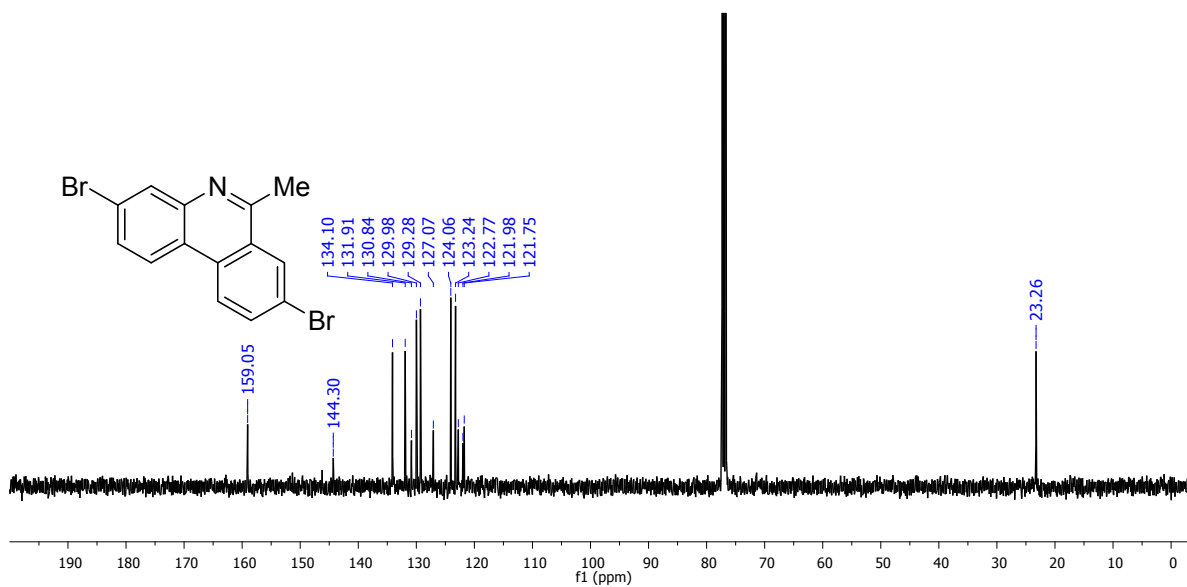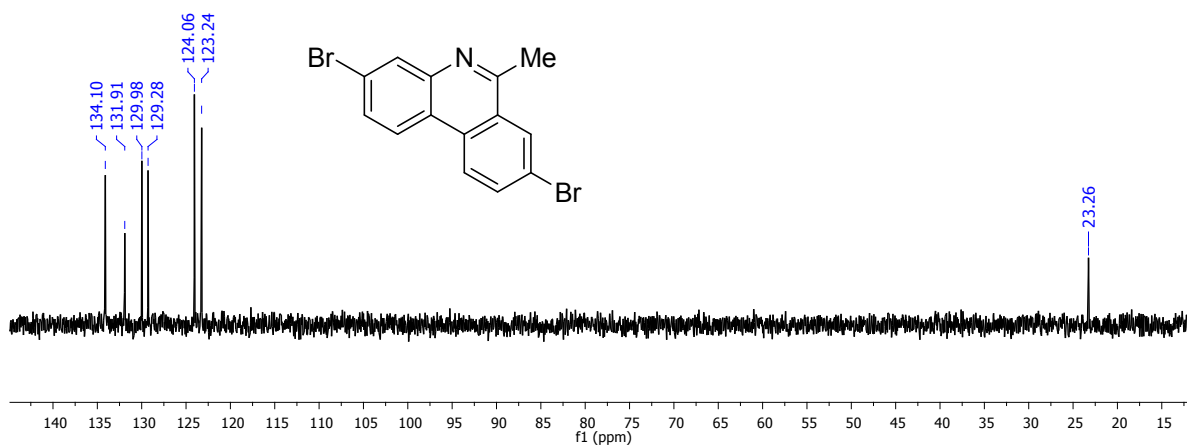

# $^1\text{H}$ , $^{13}\text{C}$ and DEPT NMR Spectra's of compound of 4e.

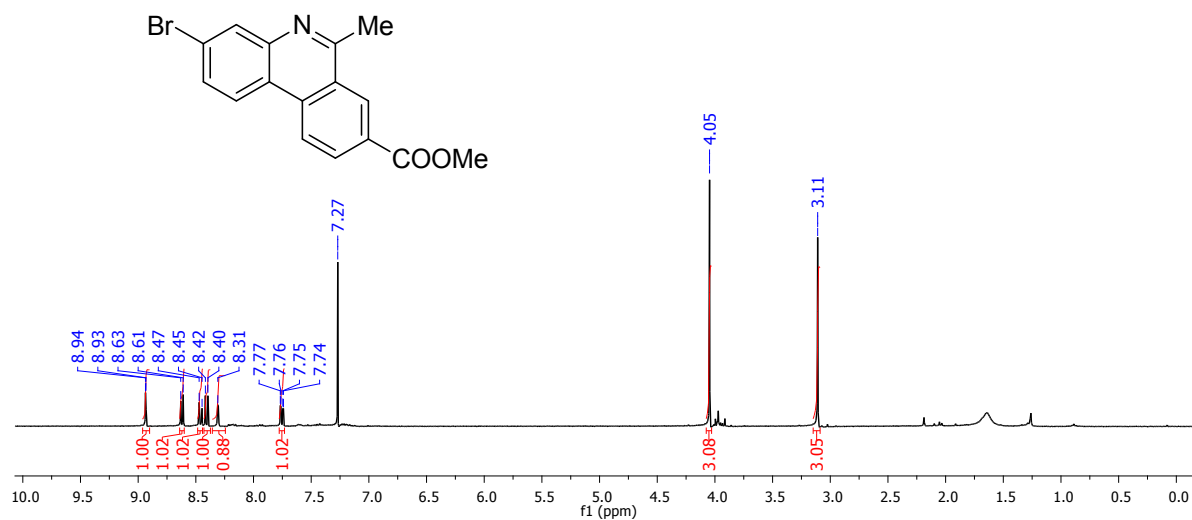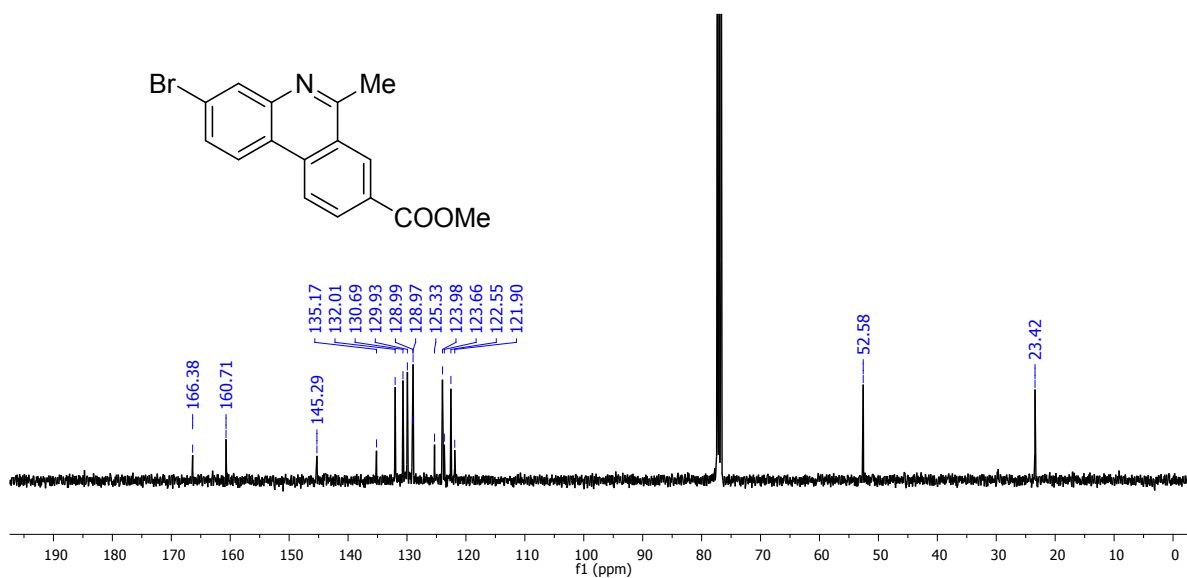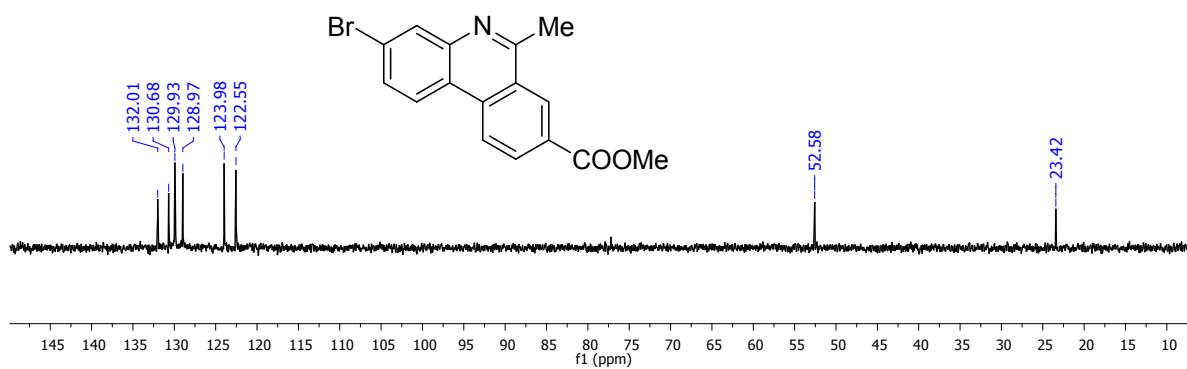

# $^1\text{H}$ , $^{13}\text{C}$ and DEPT NMR Spectra's of compound of 4f.

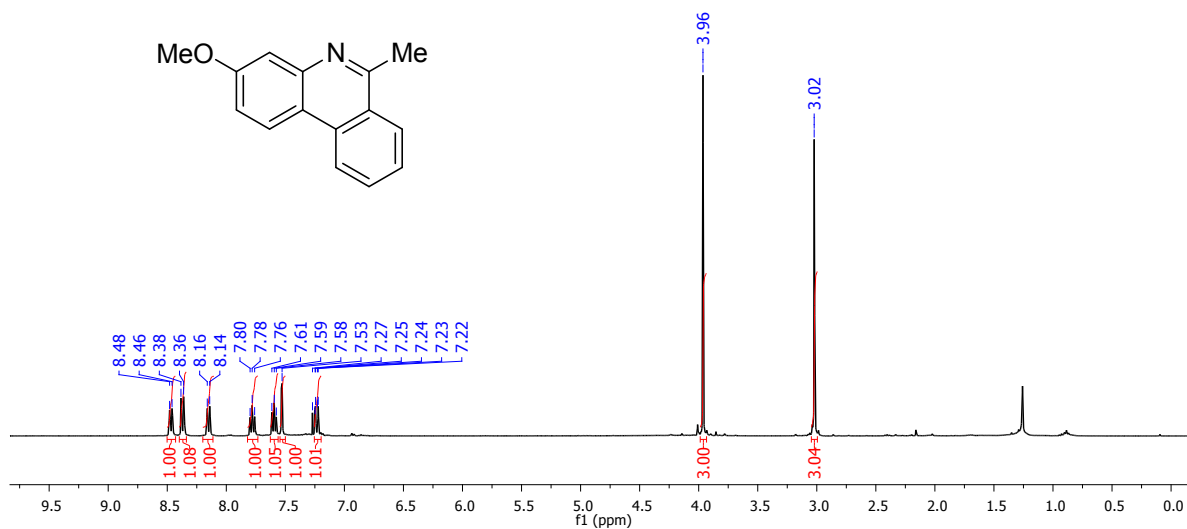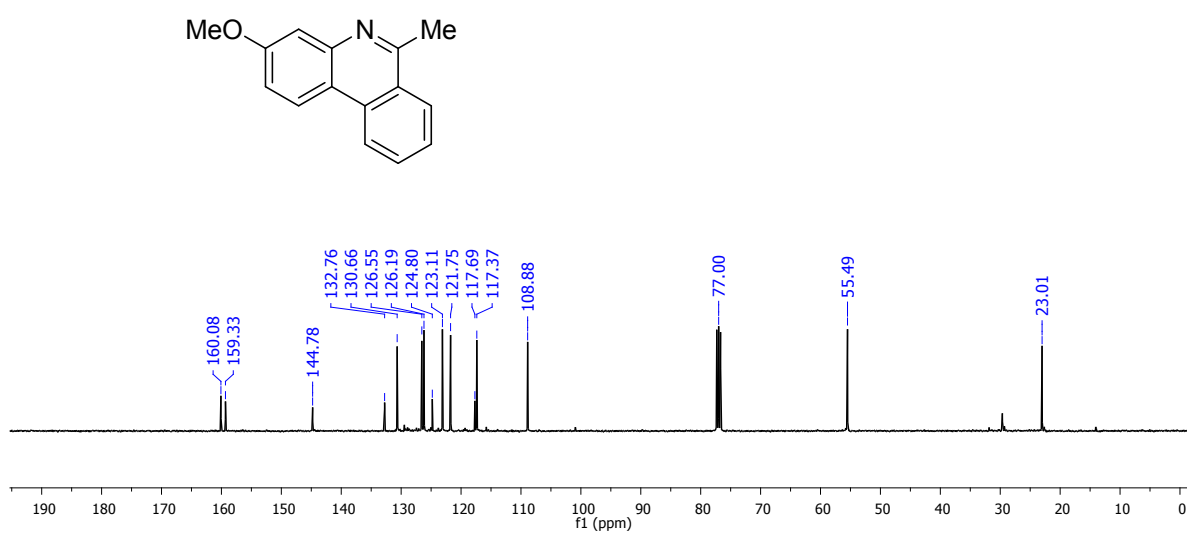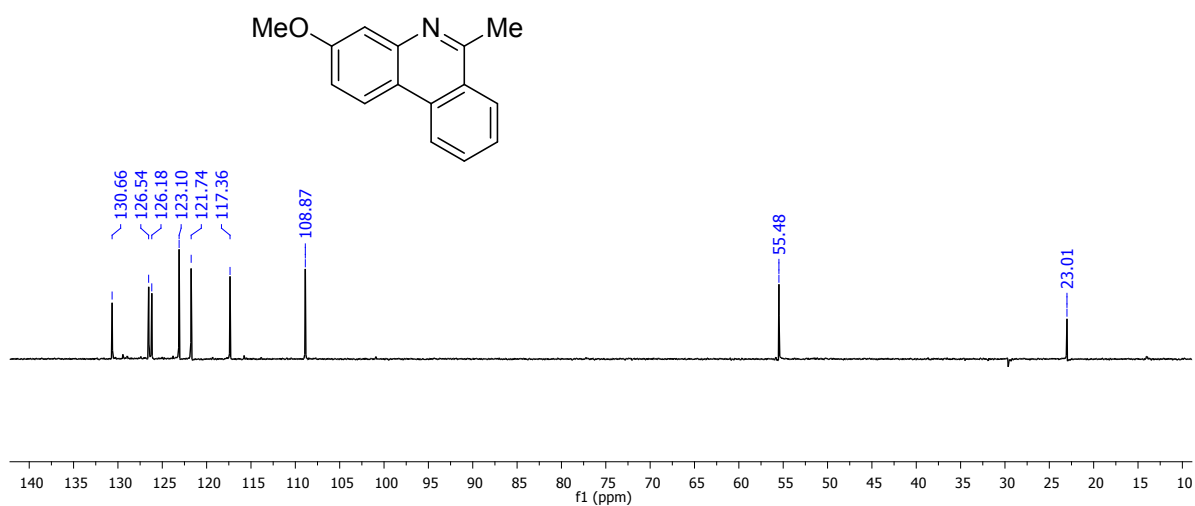



# $^1\text{H}$ , $^{13}\text{C}$ and DEPT NMR Spectra's of compound of 4g.

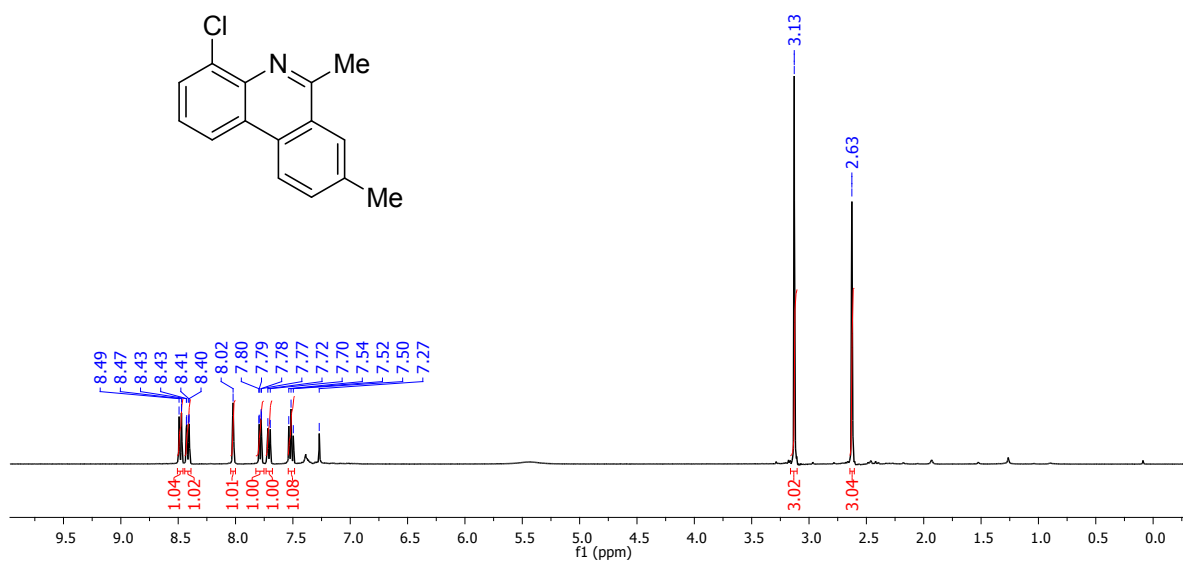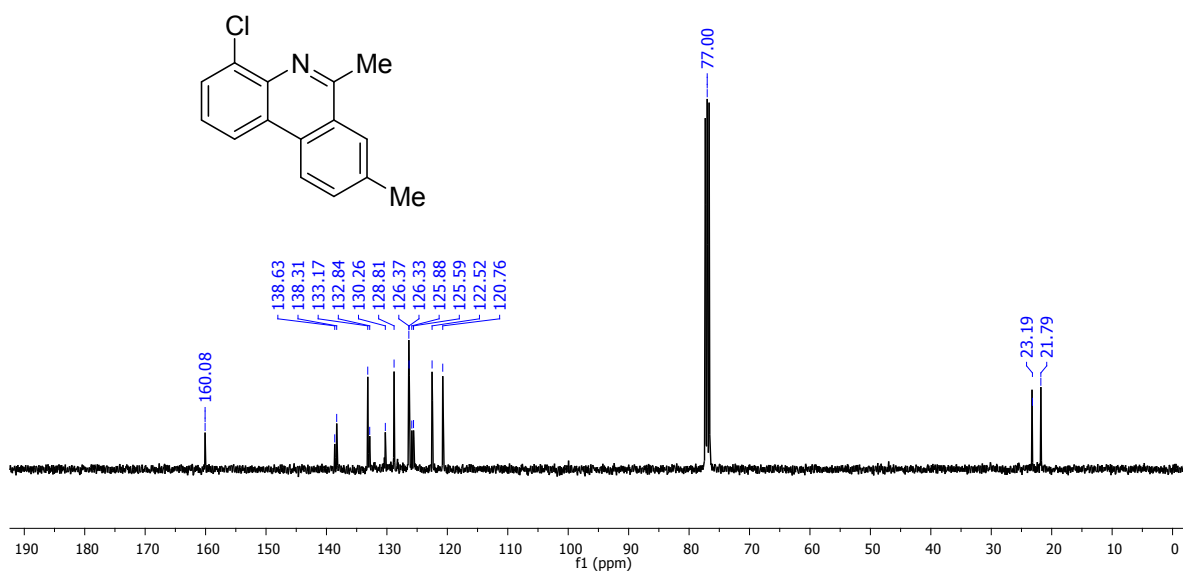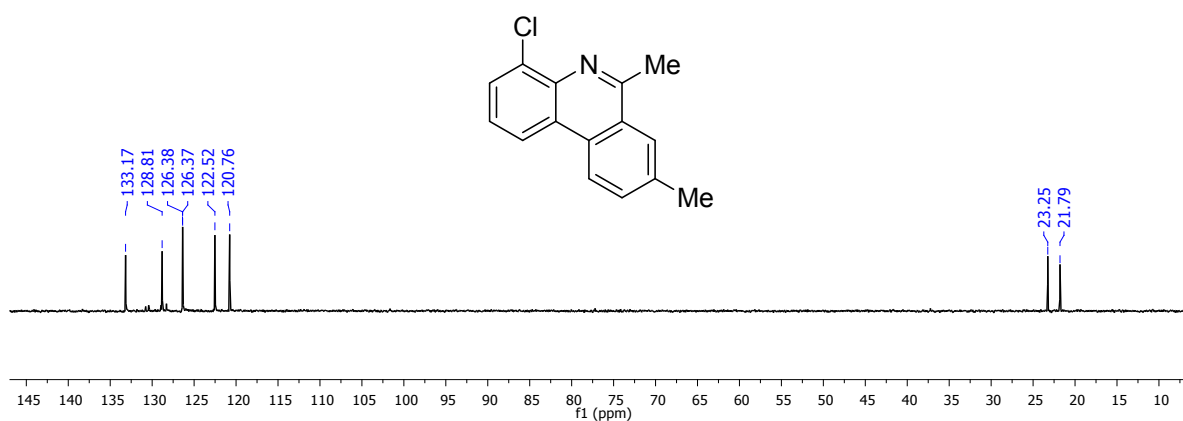

# $^1\text{H}$ , $^{13}\text{C}$ and DEPT NMR Spectra's of compound of 4h.

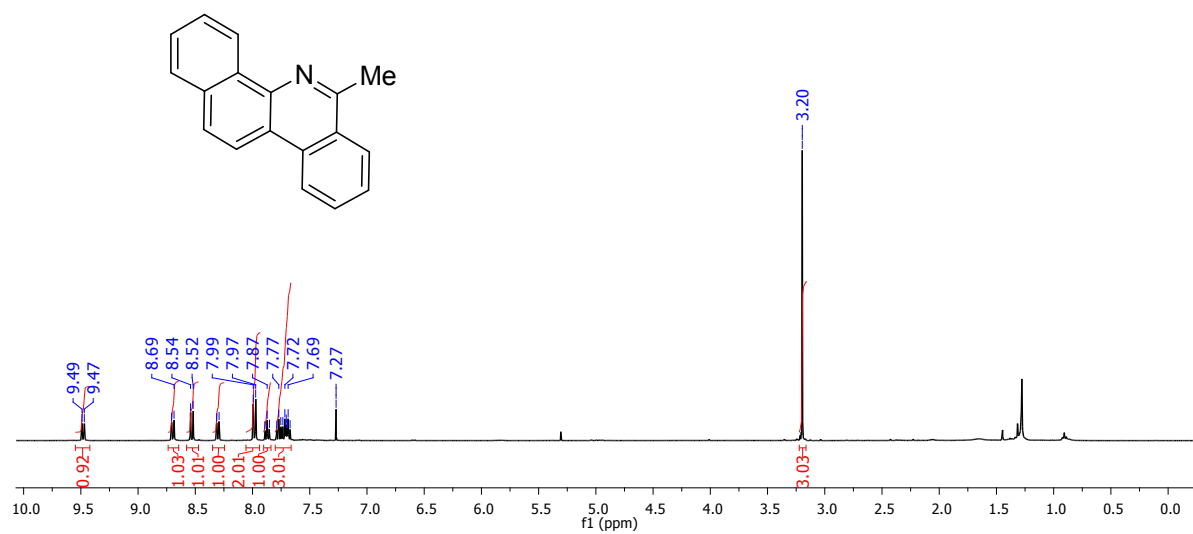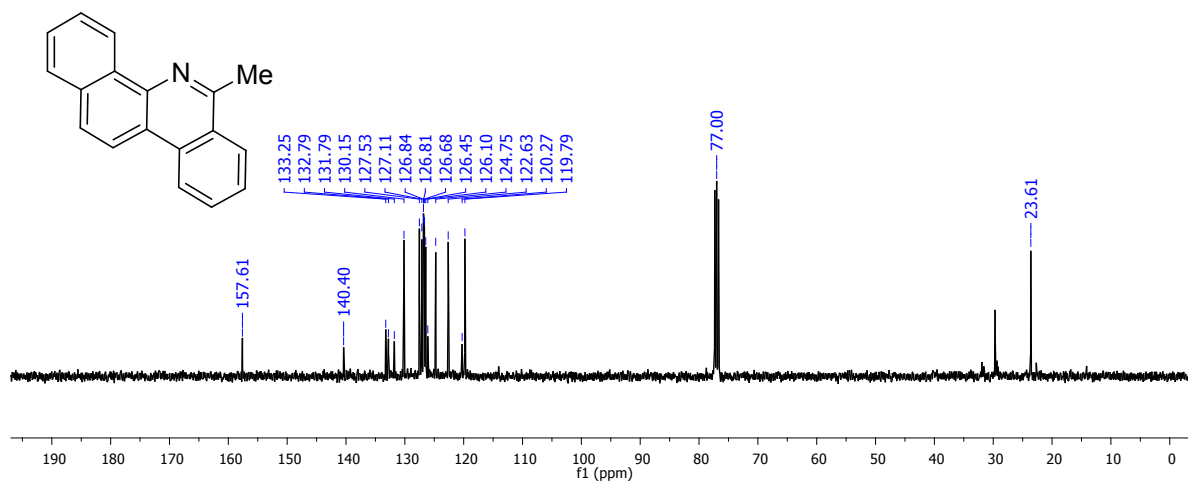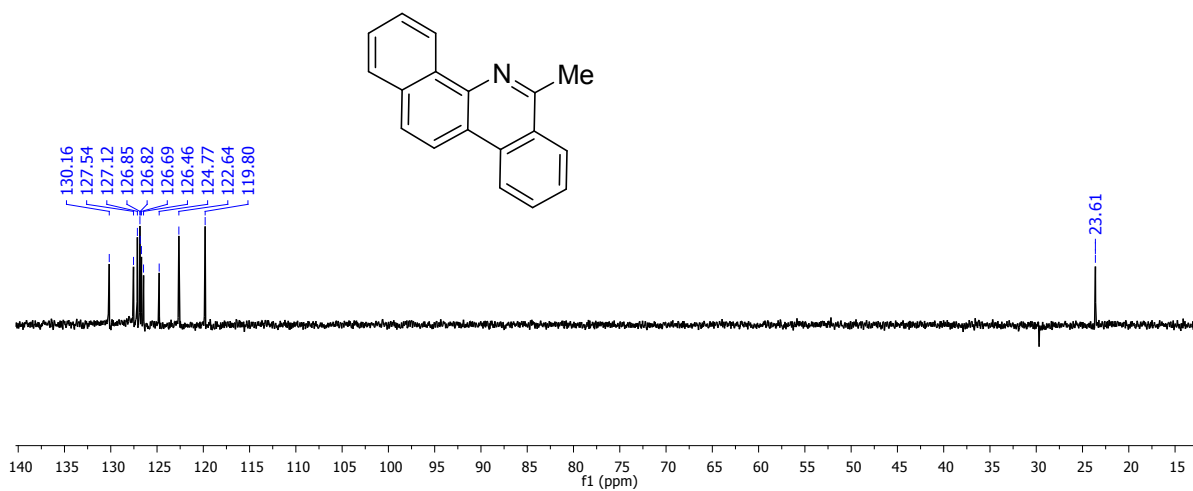

# $^1\text{H}$ , $^{13}\text{C}$ and DEPT NMR Spectra's of compound of 4i.

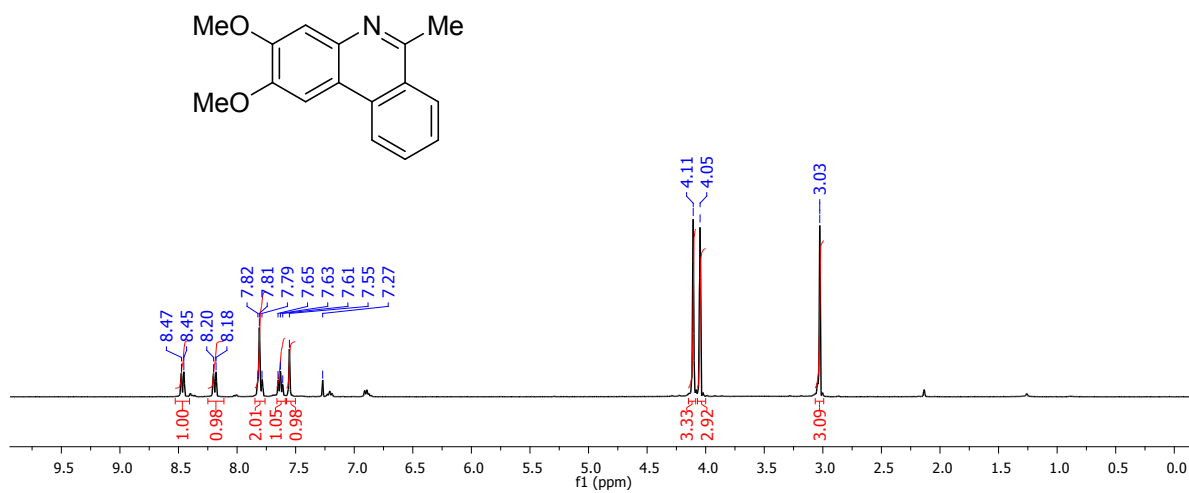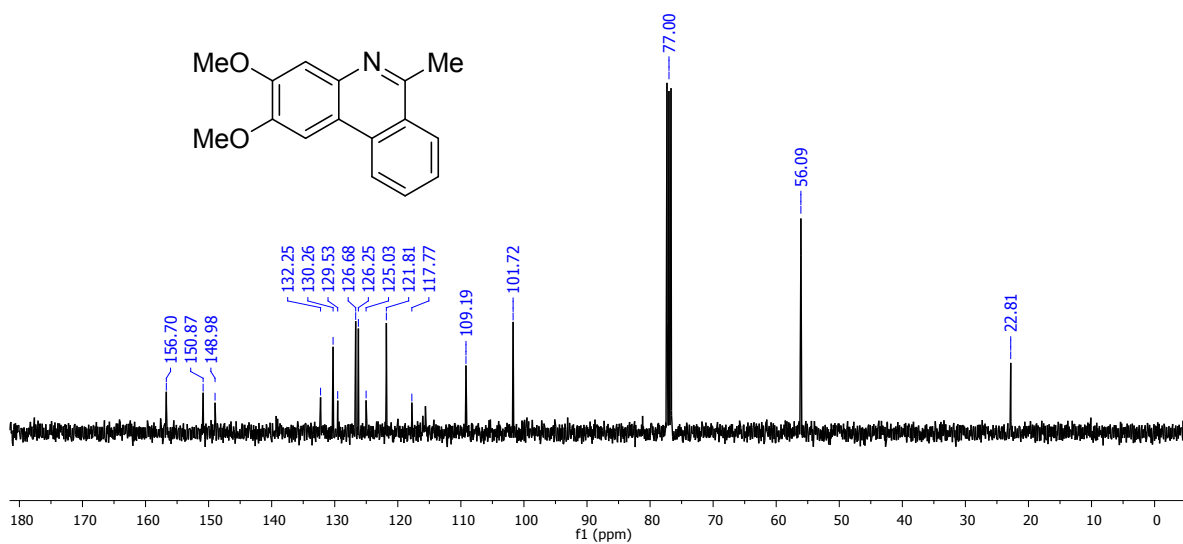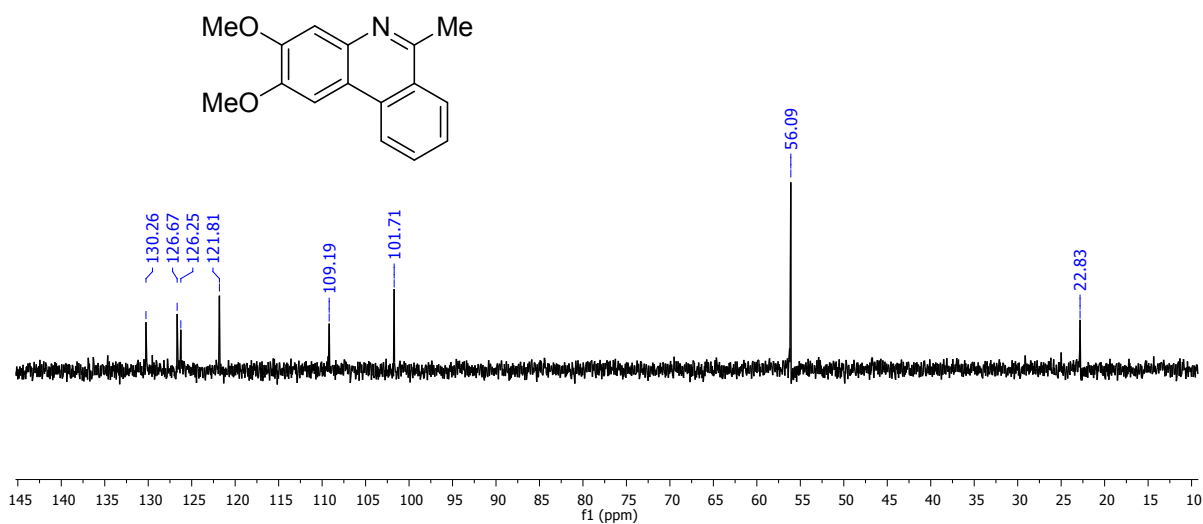

# $^1\text{H}$ , $^{13}\text{C}$ and DEPT NMR Spectra's of compound of 4ja.

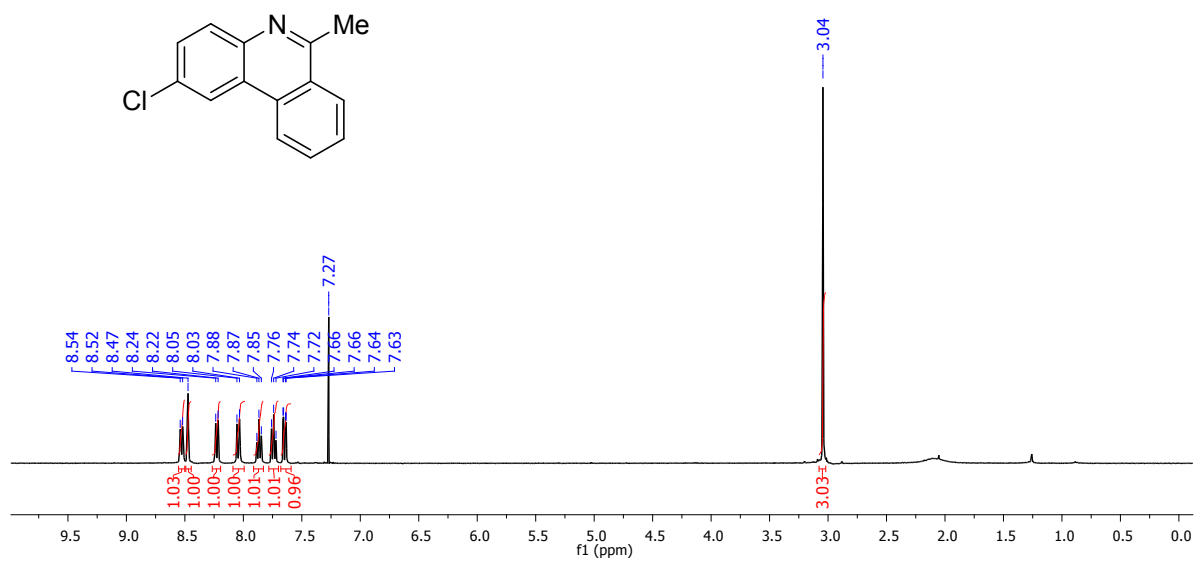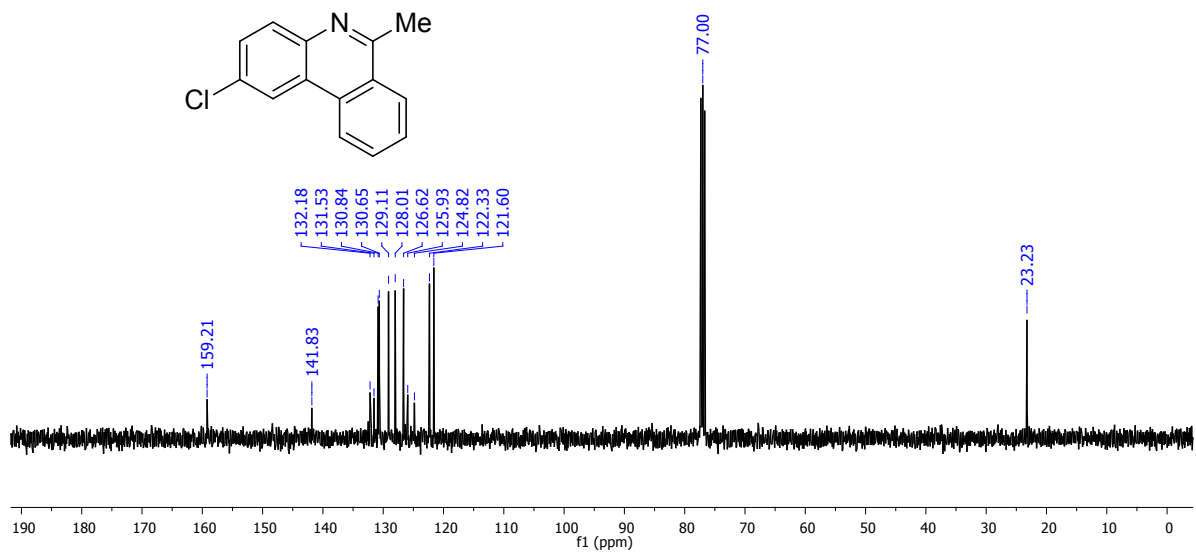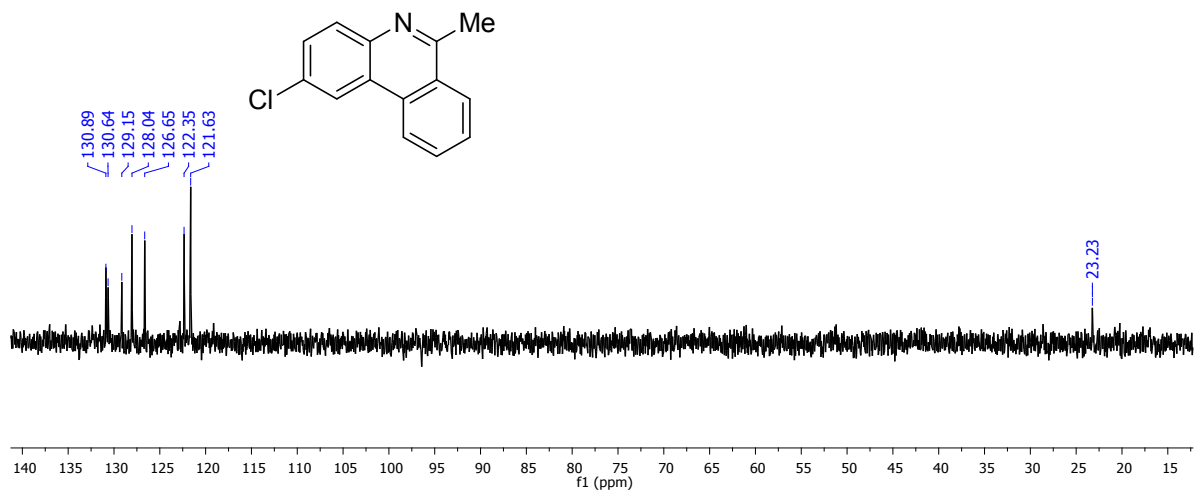

# $^1\text{H}$ , $^{13}\text{C}$ and DEPT NMR Spectra's of compound of 4jb.

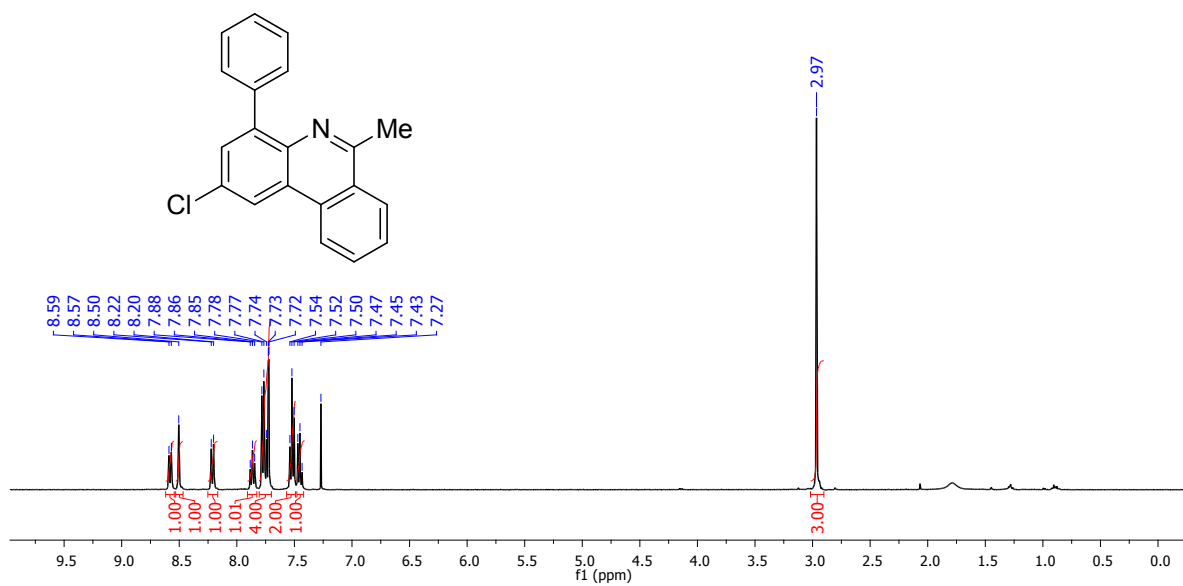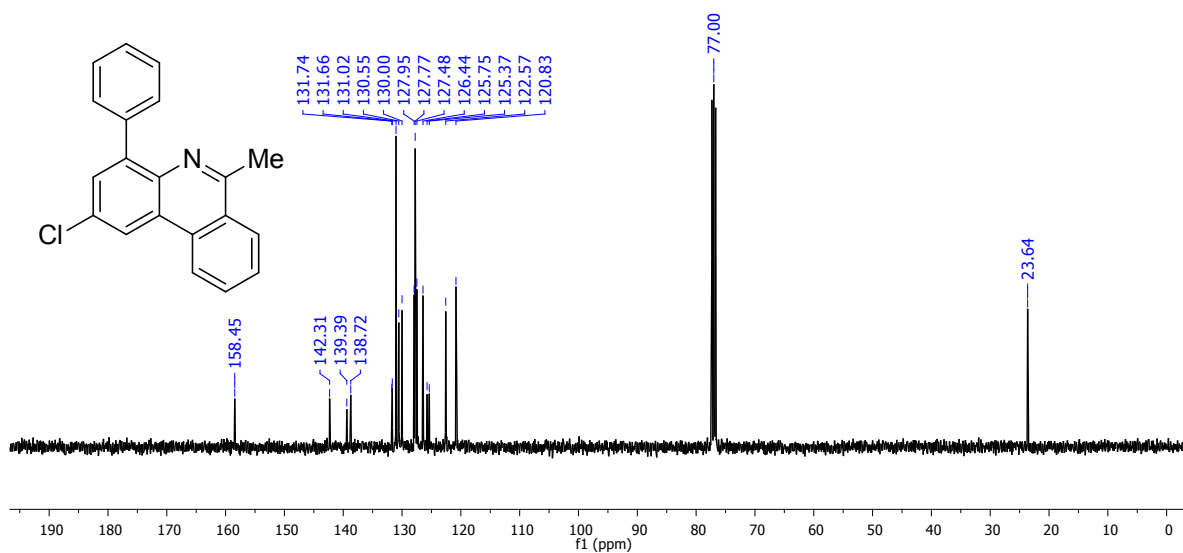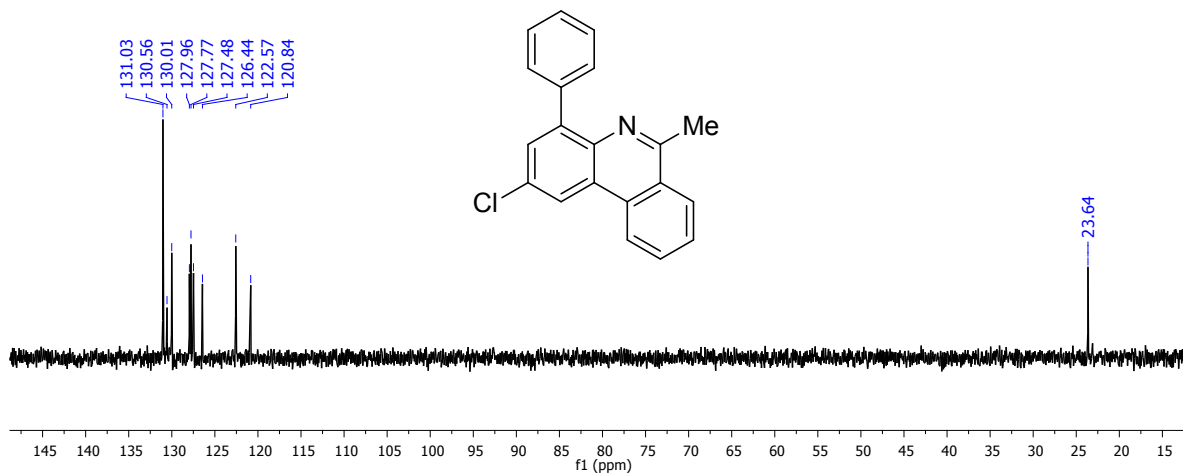

# $^1\text{H}$ , $^{13}\text{C}$ and DEPT NMR Spectra's of compound of 4ka.

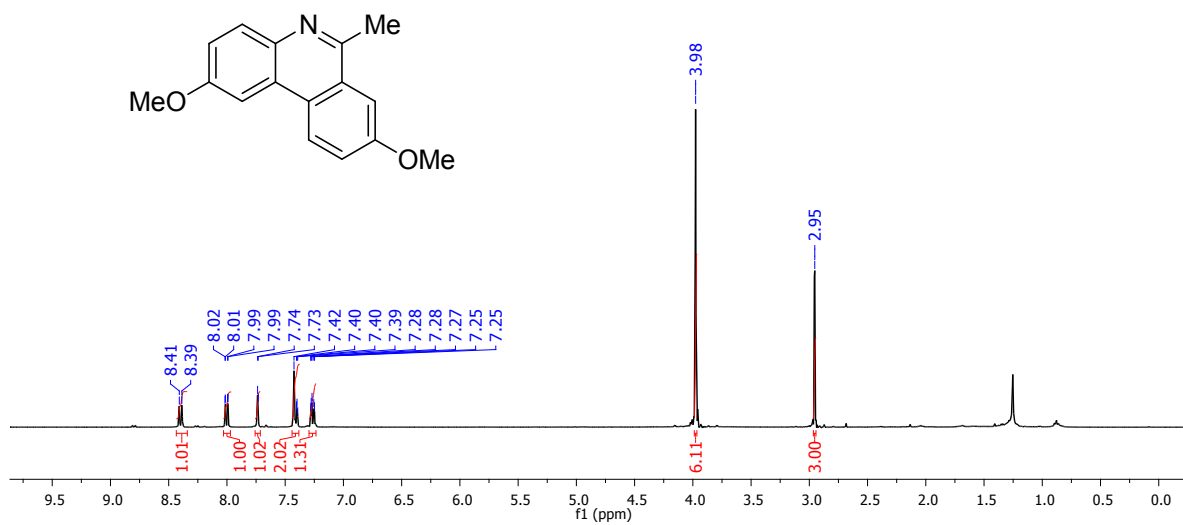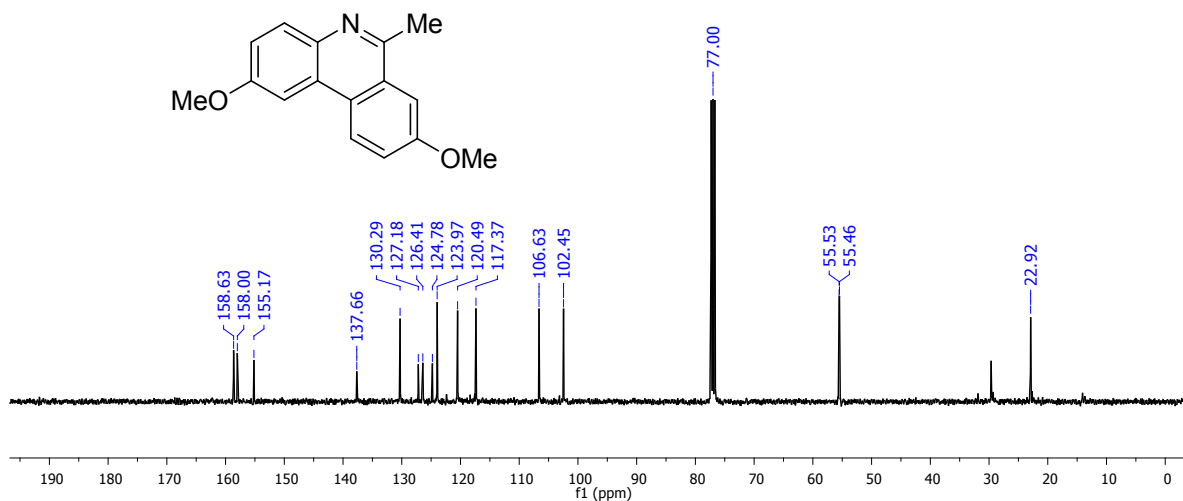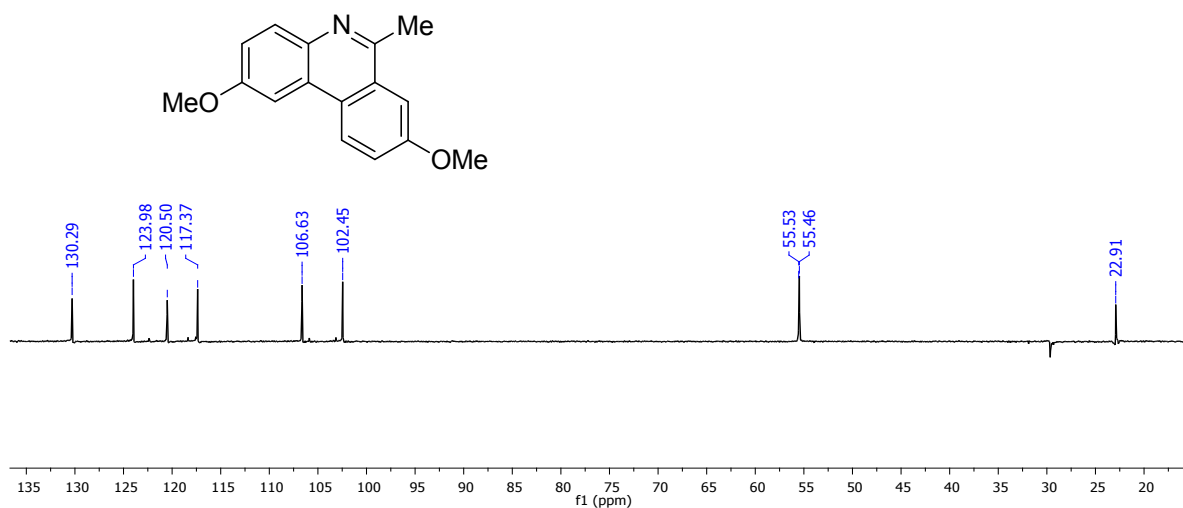

# $^1\text{H}$ , $^{13}\text{C}$ and DEPT NMR Spectra's of compound of 4la.

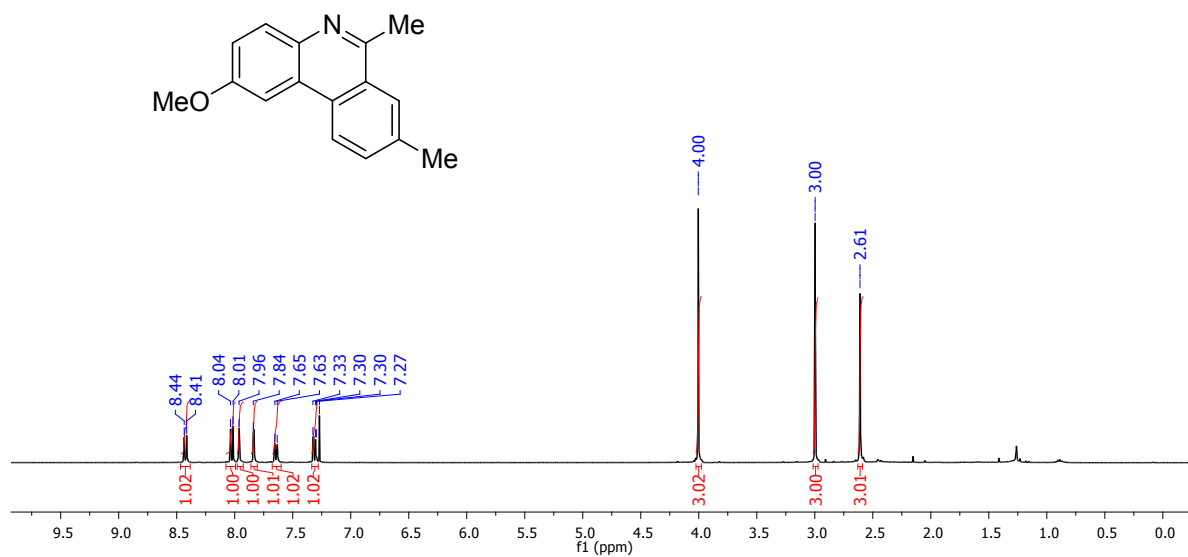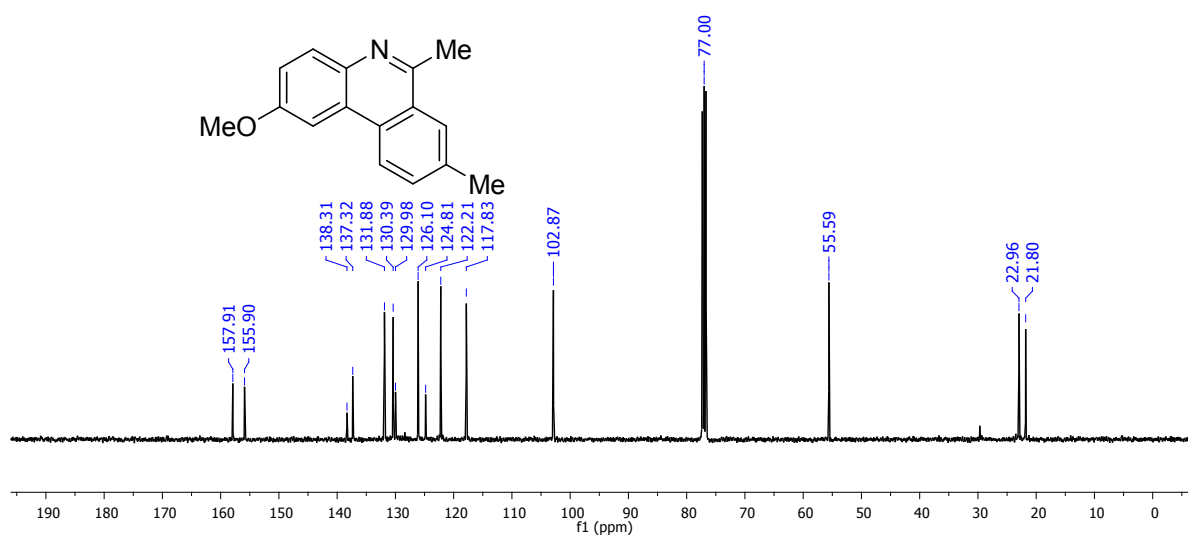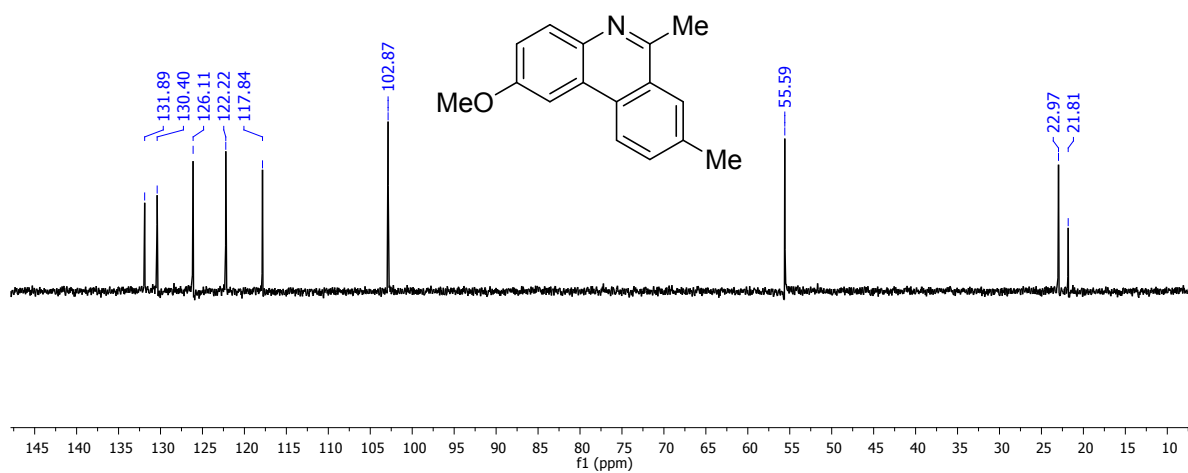

**$^1\text{H}$ ,  $^{13}\text{C}$  and DEPT NMR Spectra's of compound of 4lb.**

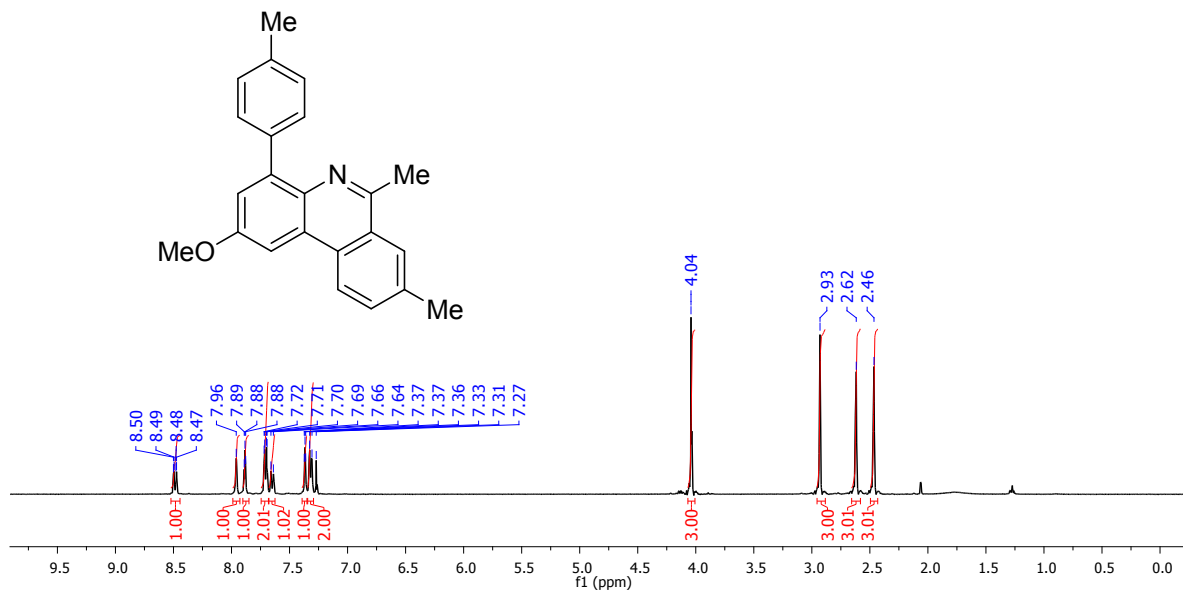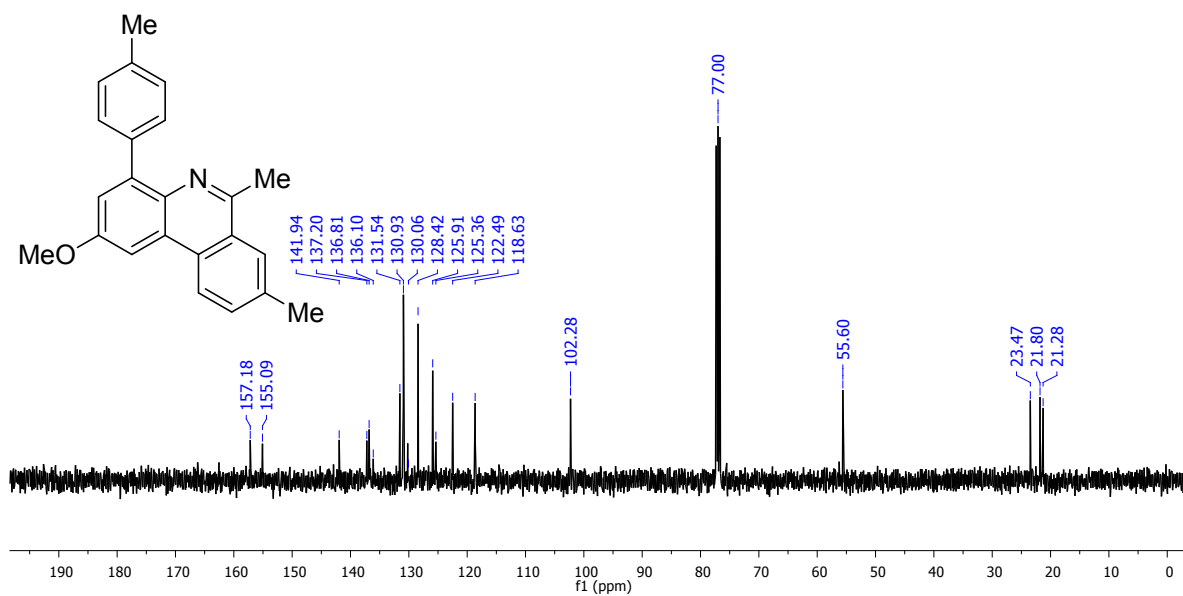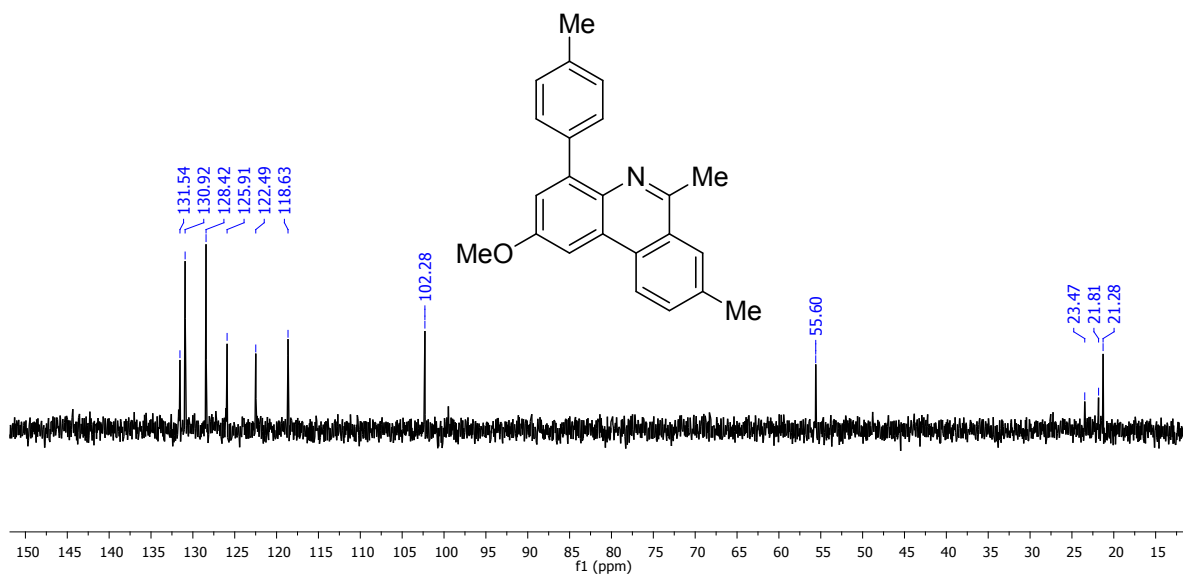



# $^1\text{H}$ , $^{13}\text{C}$ and DEPT NMR Spectra's of compound of 4ma.

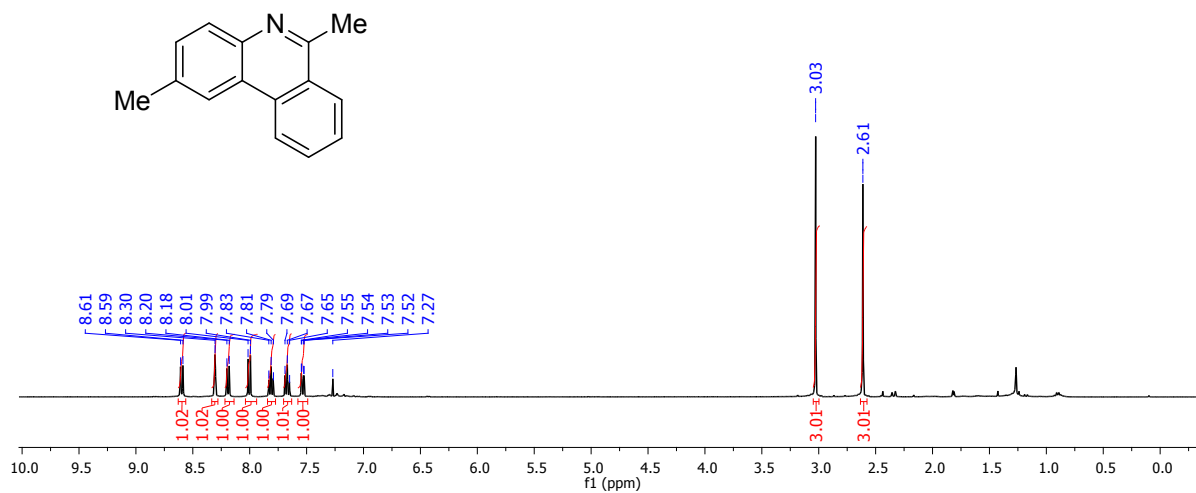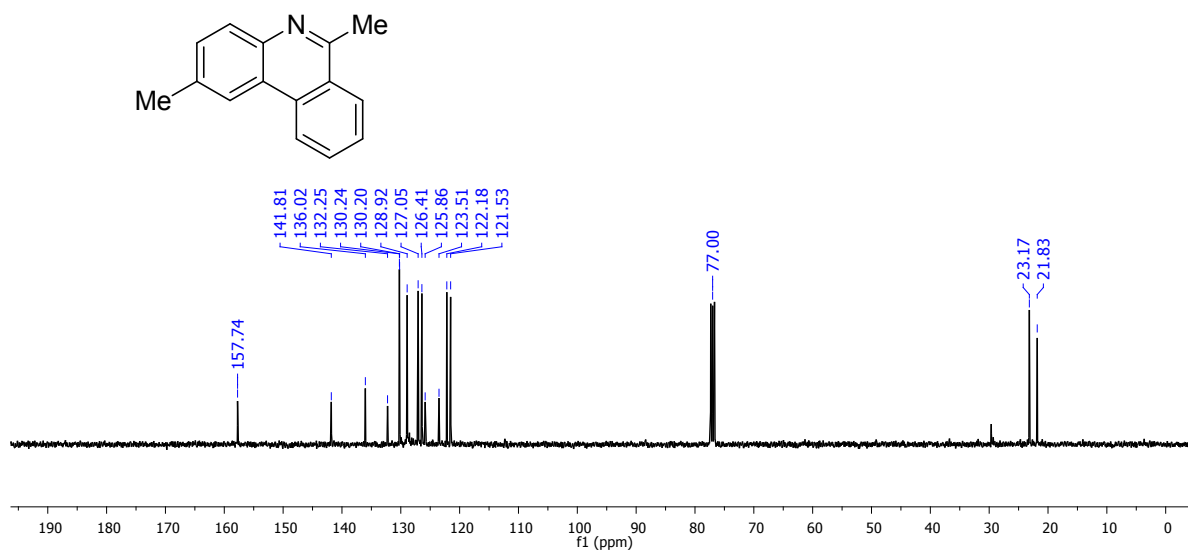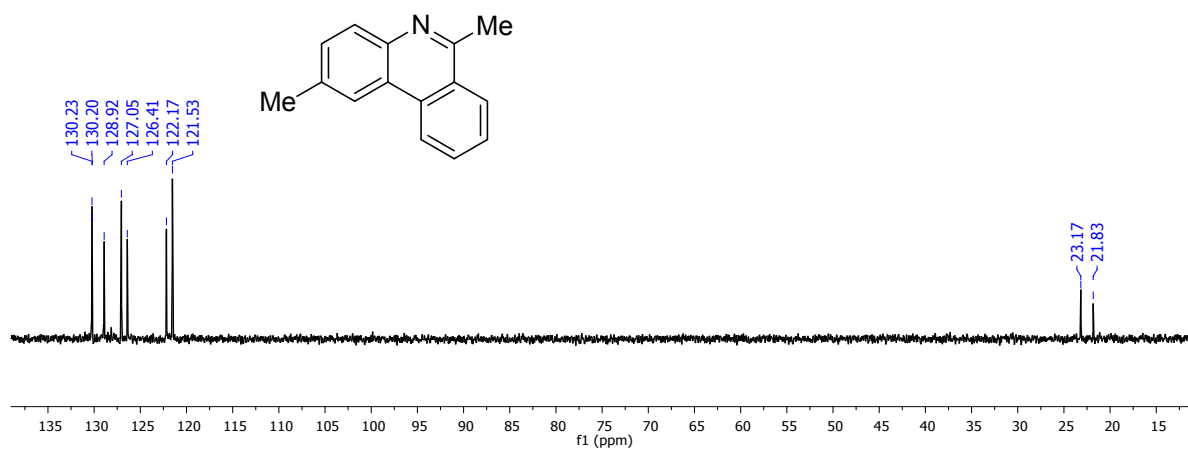

# $^1\text{H}$ , $^{13}\text{C}$ and DEPT NMR Spectra's of compound of 4na.

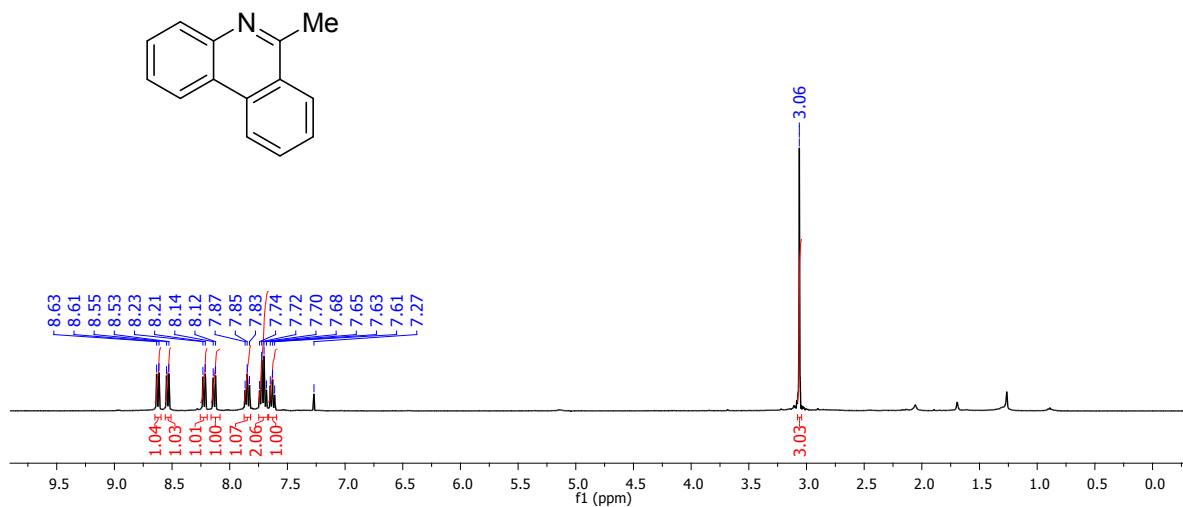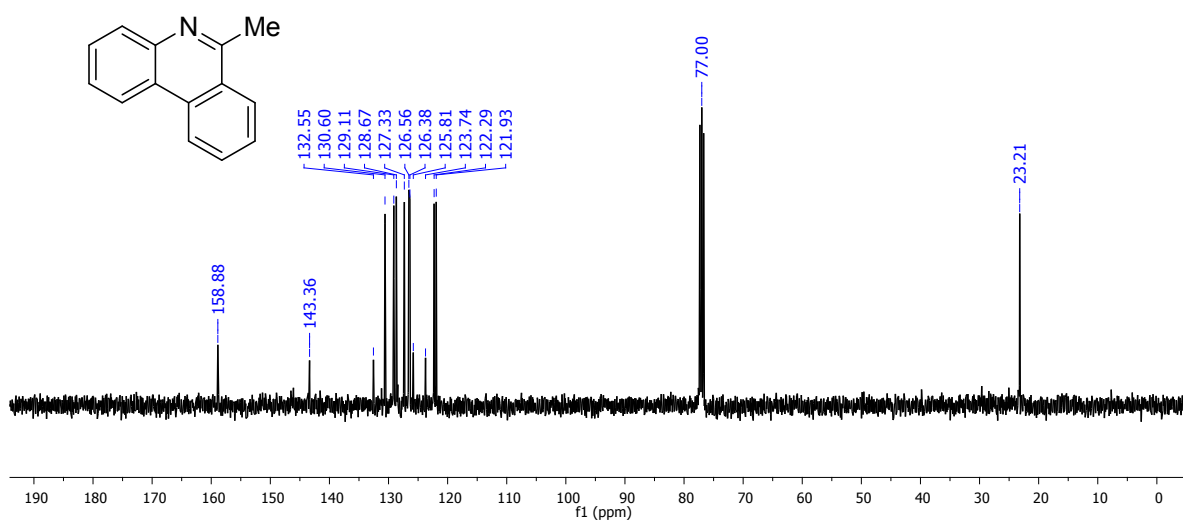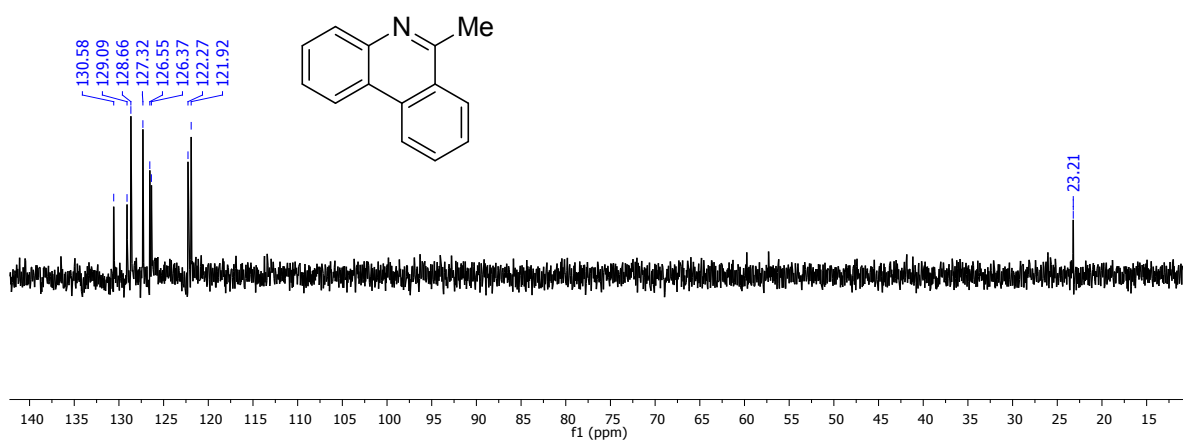

# $^1\text{H}$ , $^{13}\text{C}$ and DEPT NMR Spectra's of compound of 40a.

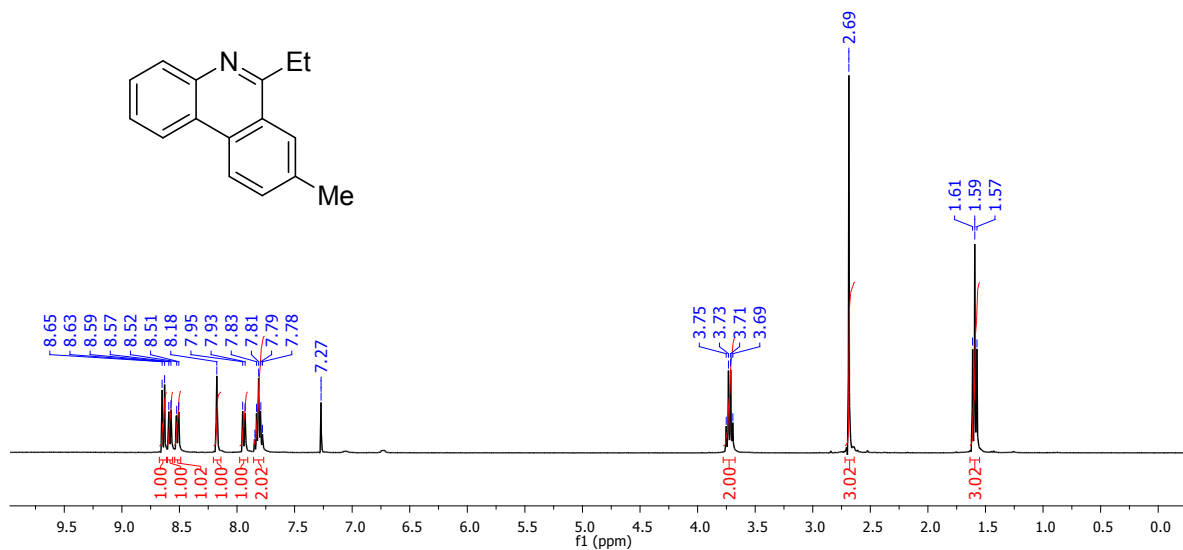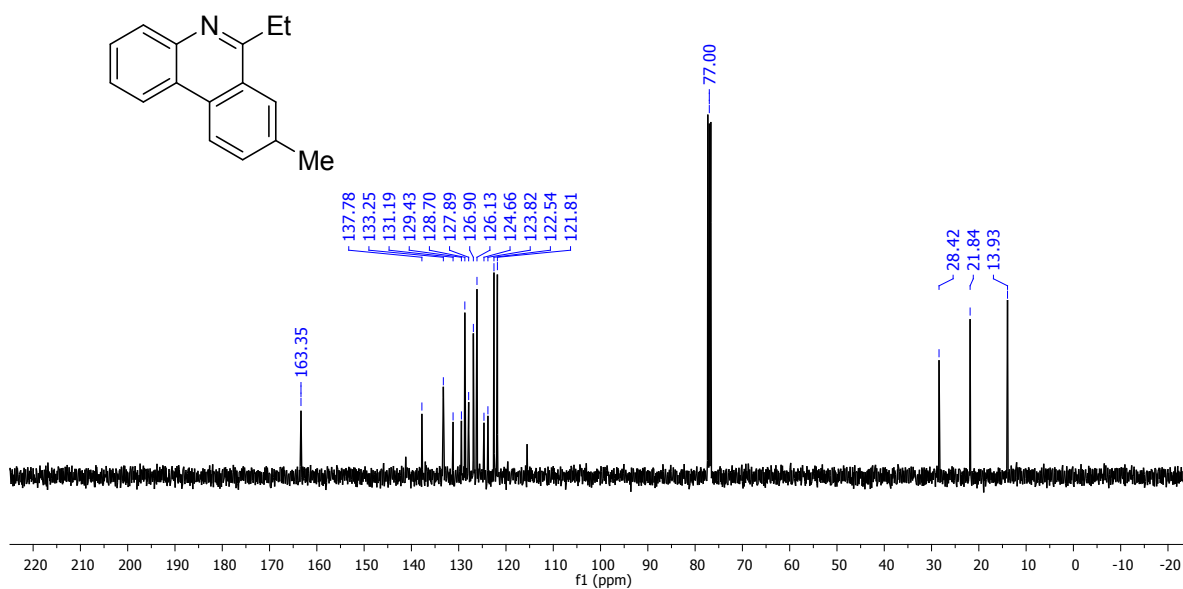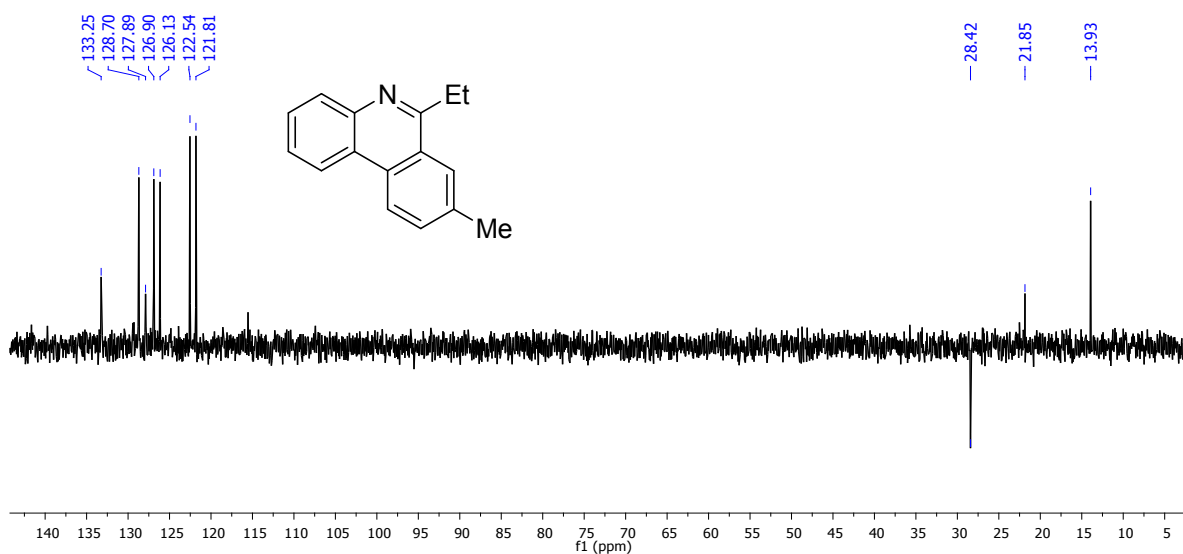

# $^1\text{H}$ , $^{13}\text{C}$ and DEPT NMR Spectra's of compound of 4ob.

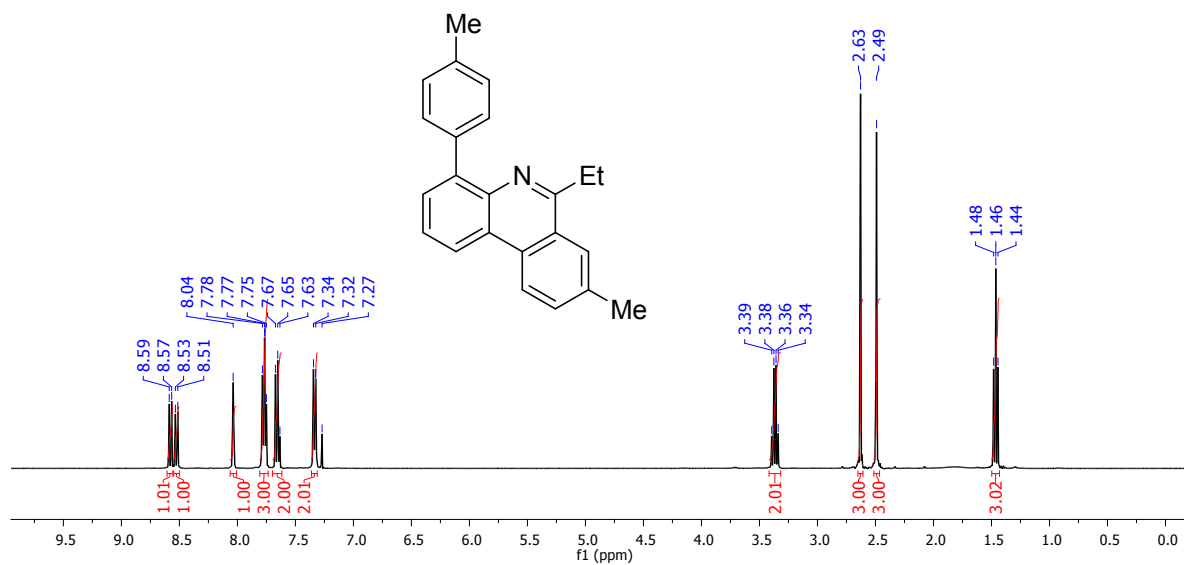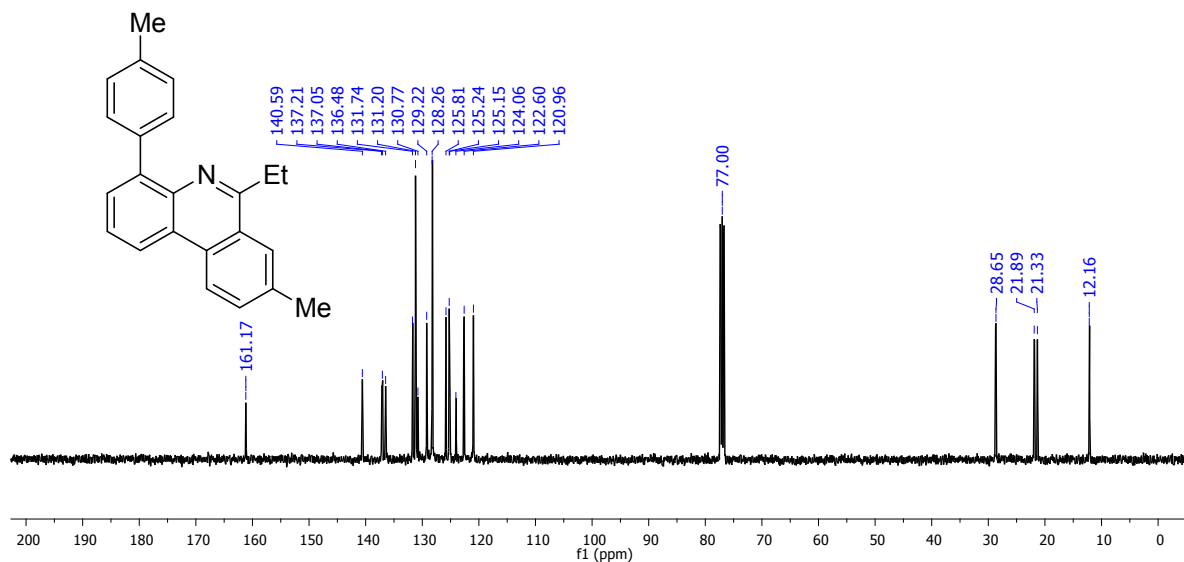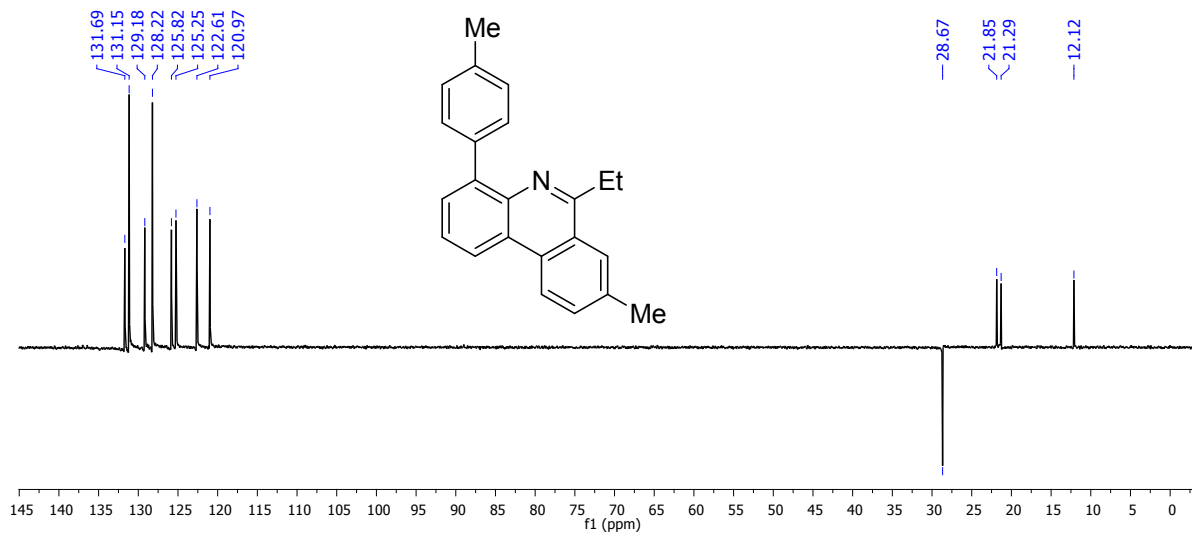

# $^1\text{H}$ , $^{13}\text{C}$ and DEPT NMR Spectra's of compound of 4pa.

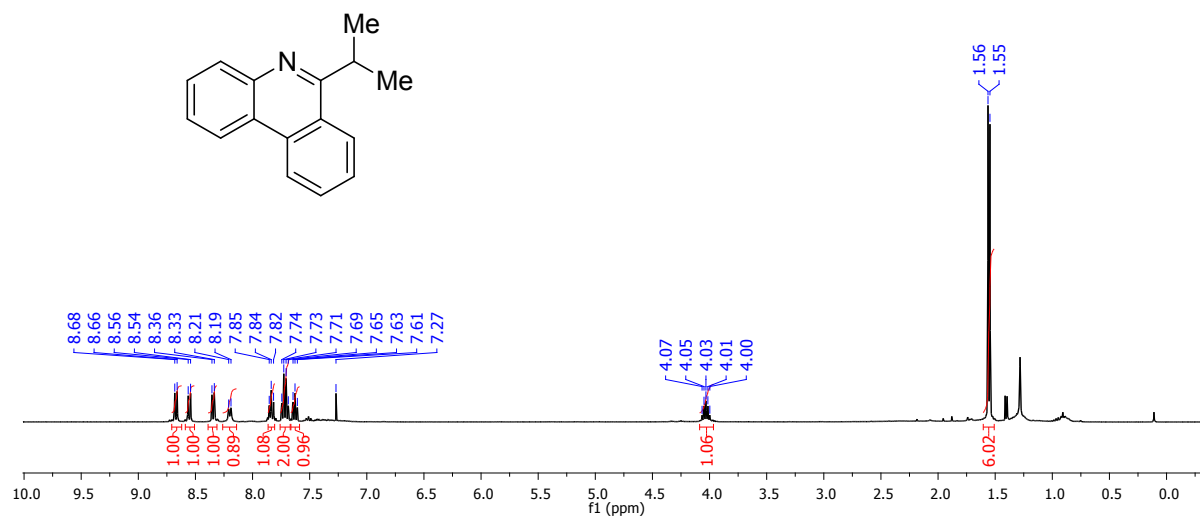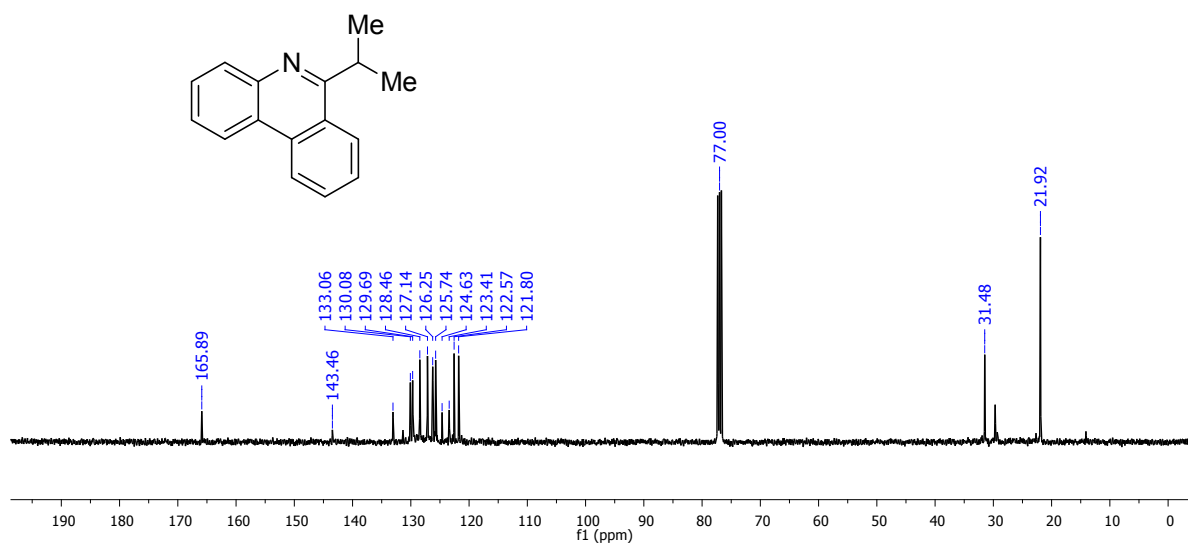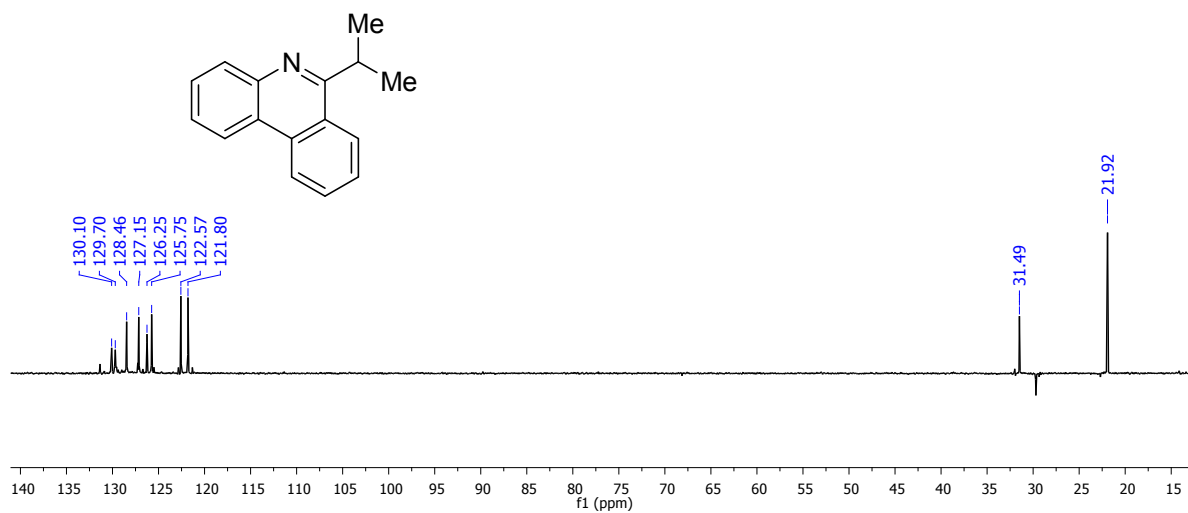

# $^1\text{H}$ , $^{13}\text{C}$ and DEPT NMR Spectra's of compound of 4qa.

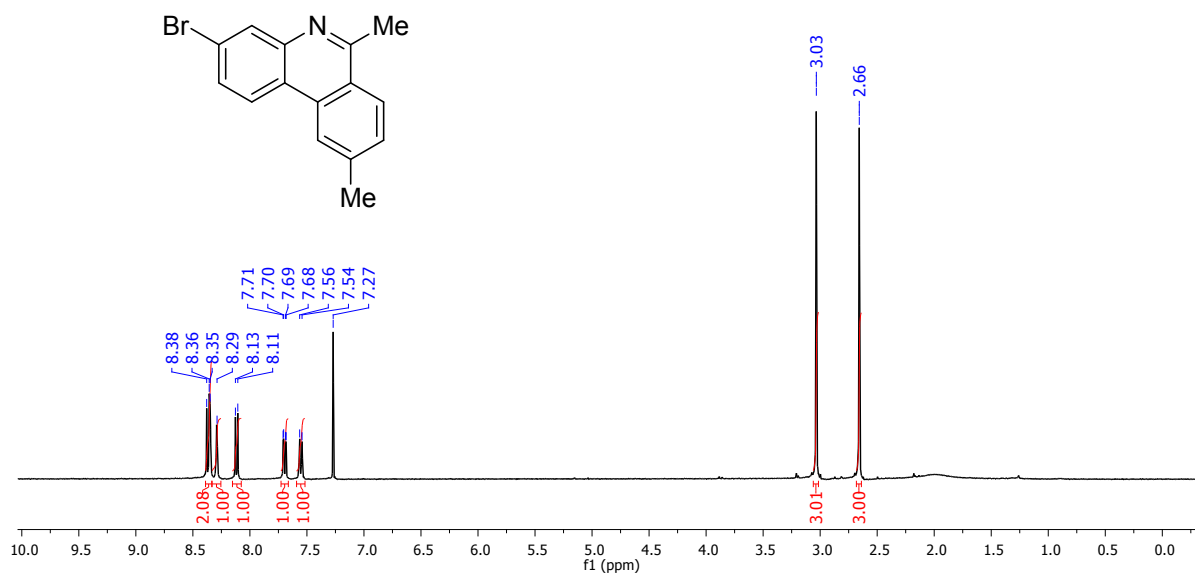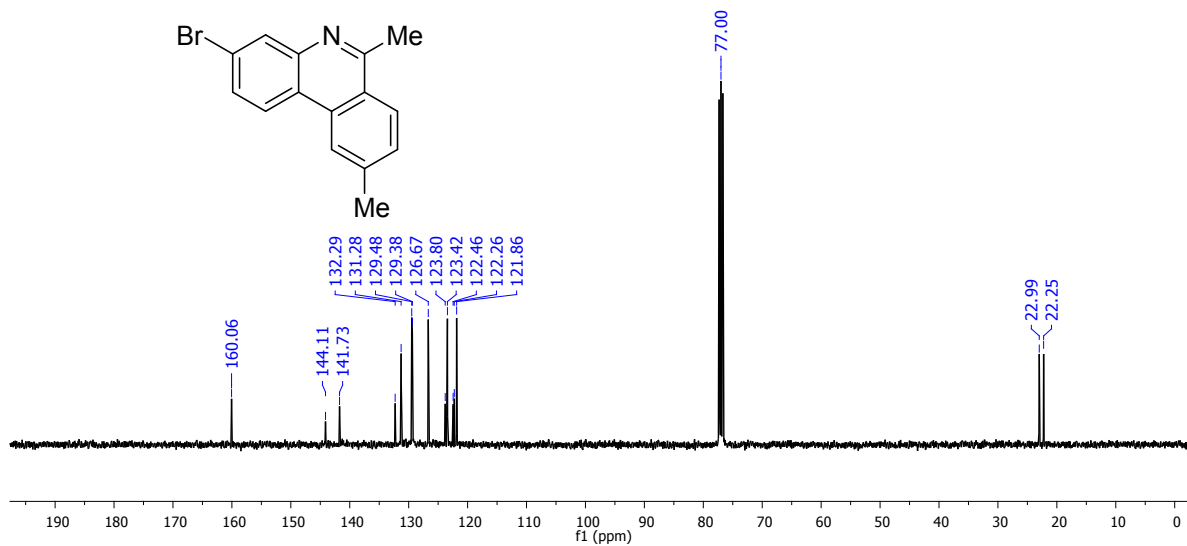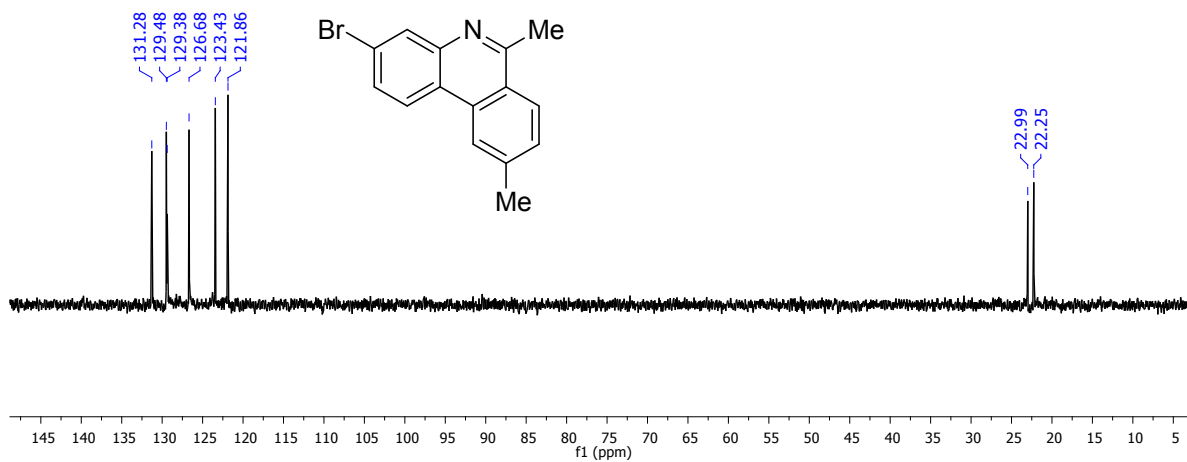

# $^1\text{H}$ , $^{13}\text{C}$ and DEPT NMR Spectra's of compound of 4ra.

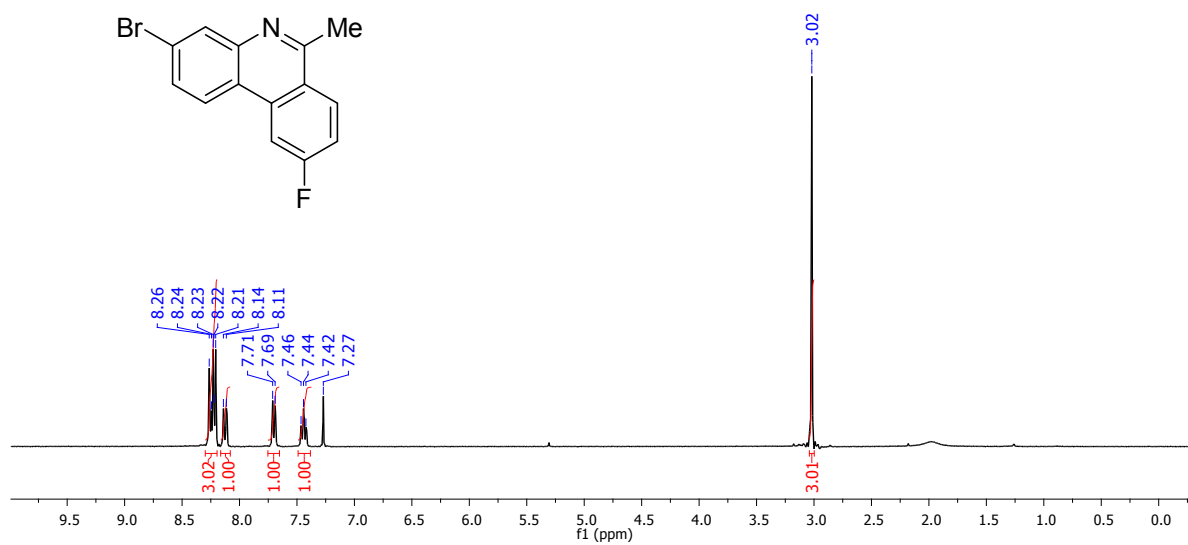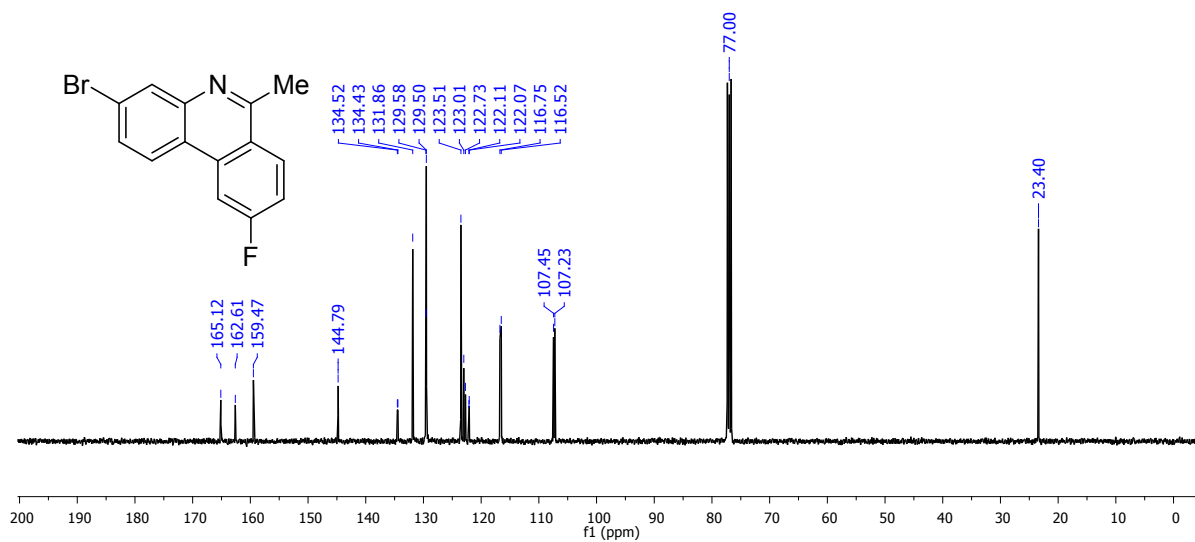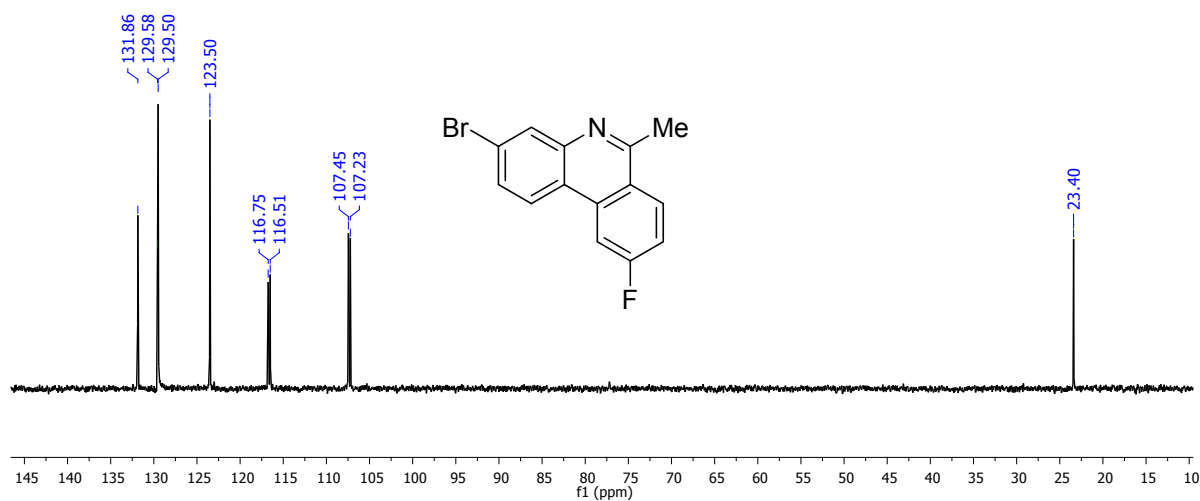

# $H^1$ NMR Spectra's of compound of 4rb.

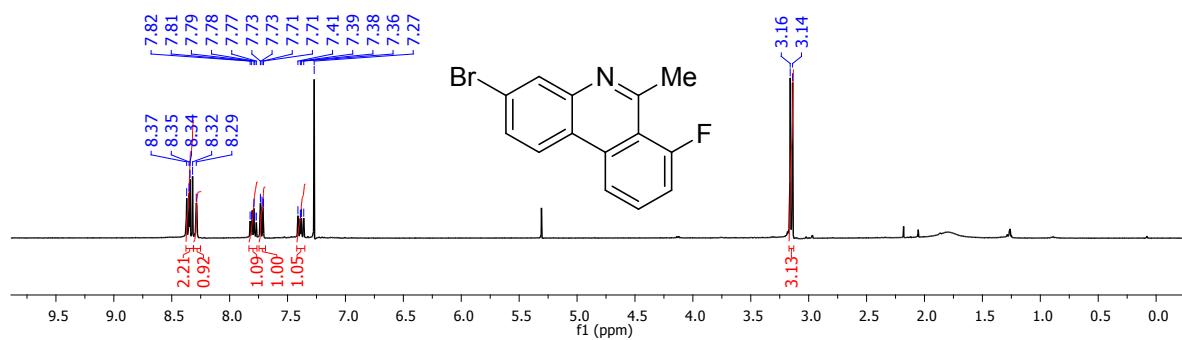



# $^1\text{H}$ , $^{13}\text{C}$ and DEPT NMR Spectra's of compound of 3a.

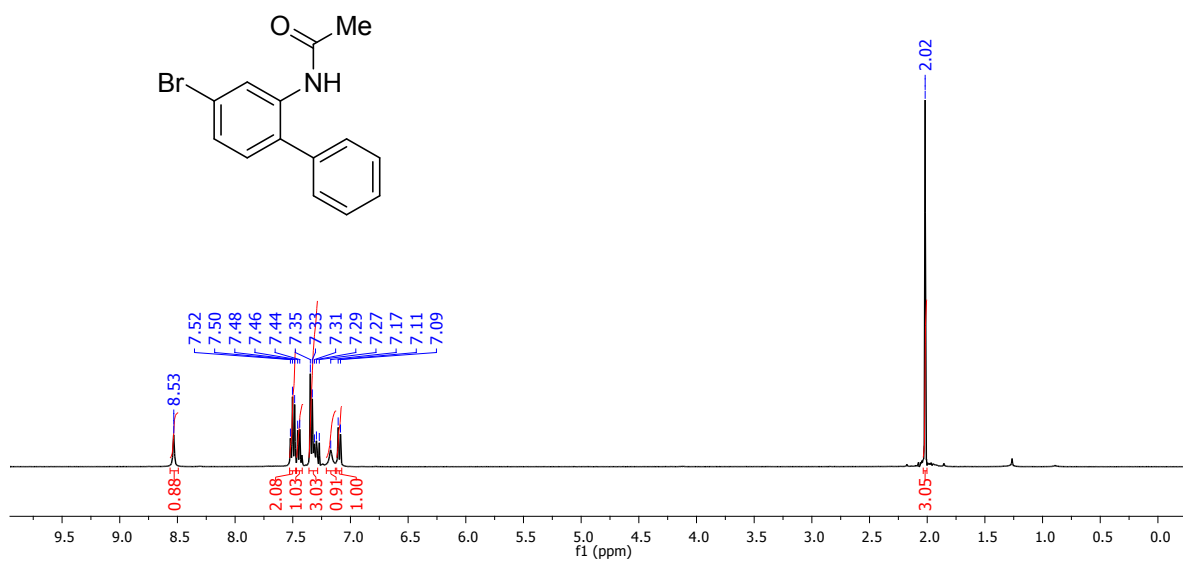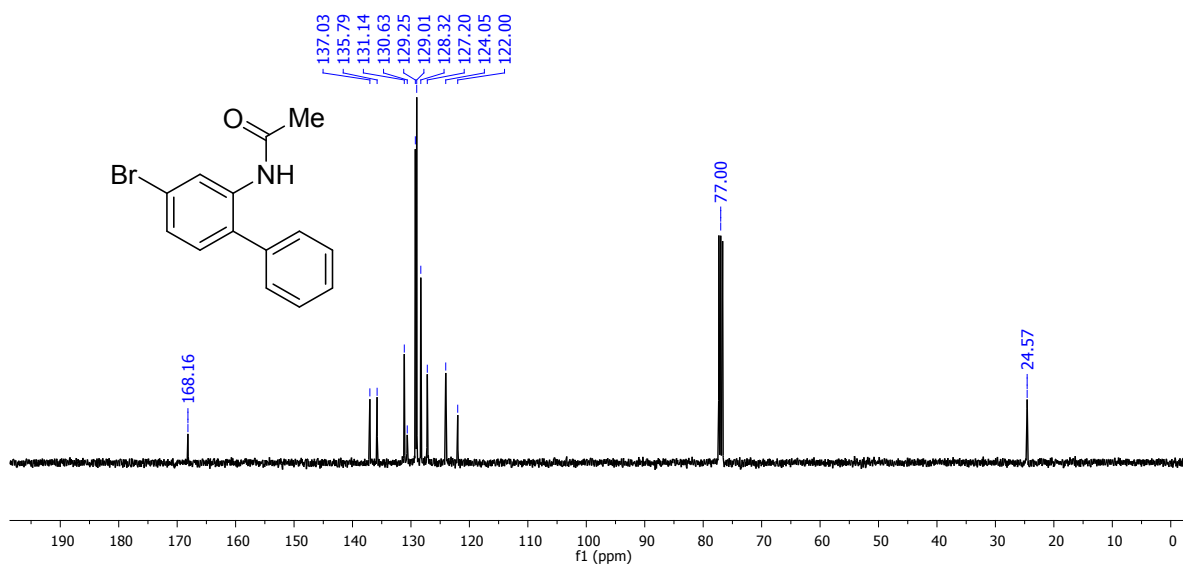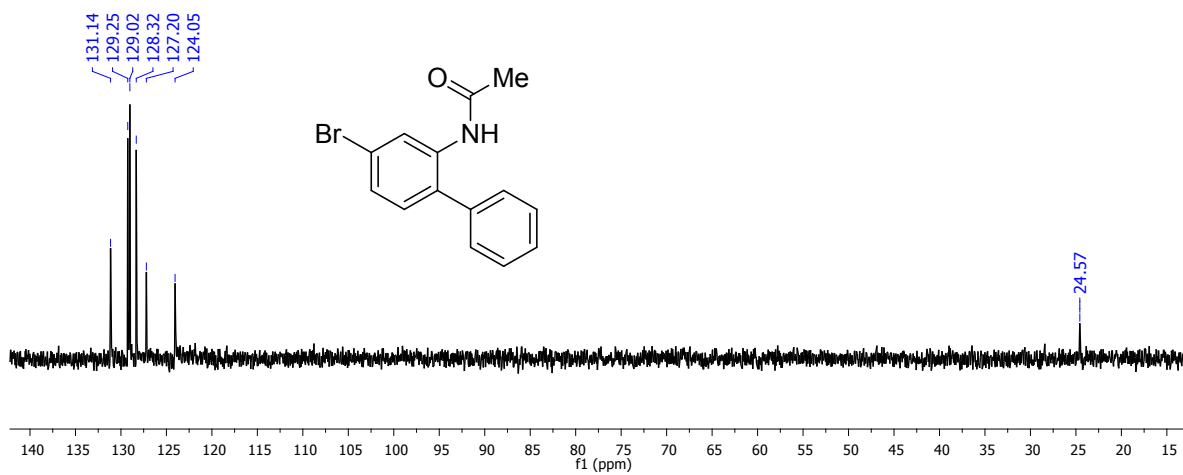

# $^1\text{H}$ , $^{13}\text{C}$ and DEPT NMR Spectra's of compound of 3b.

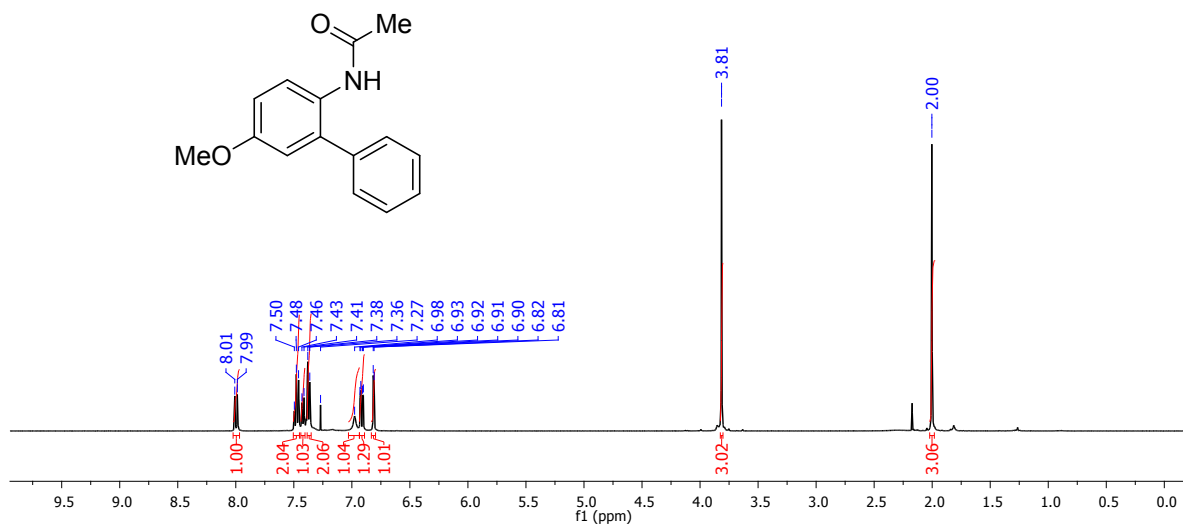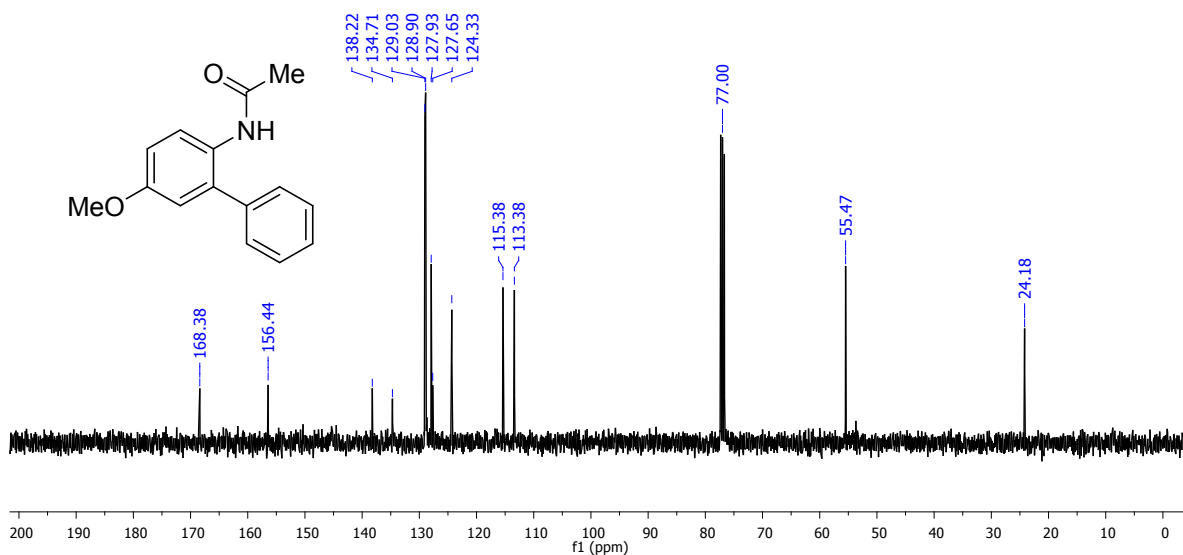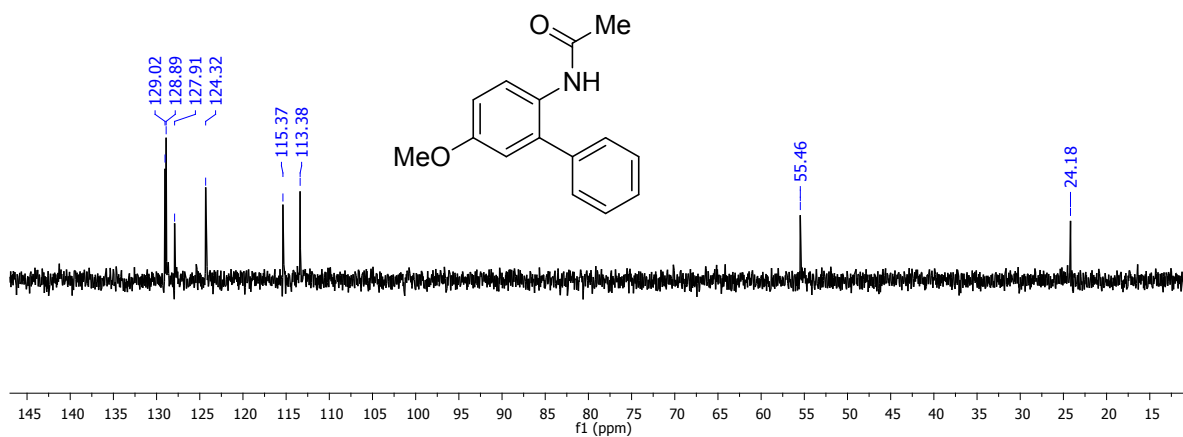

# $^1\text{H}$ , $^{13}\text{C}$ and DEPT NMR Spectra's of compound of 3c.

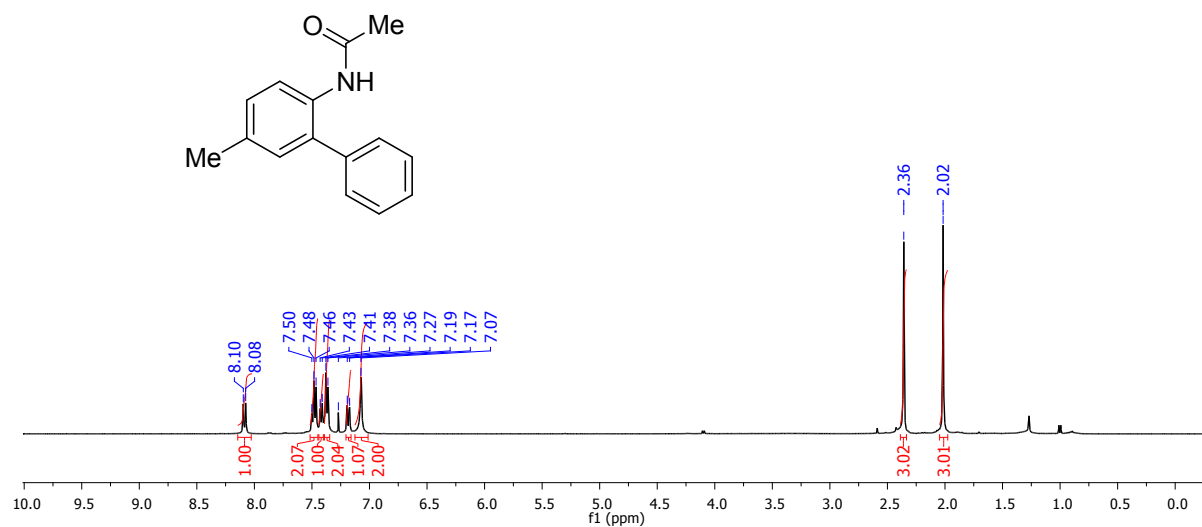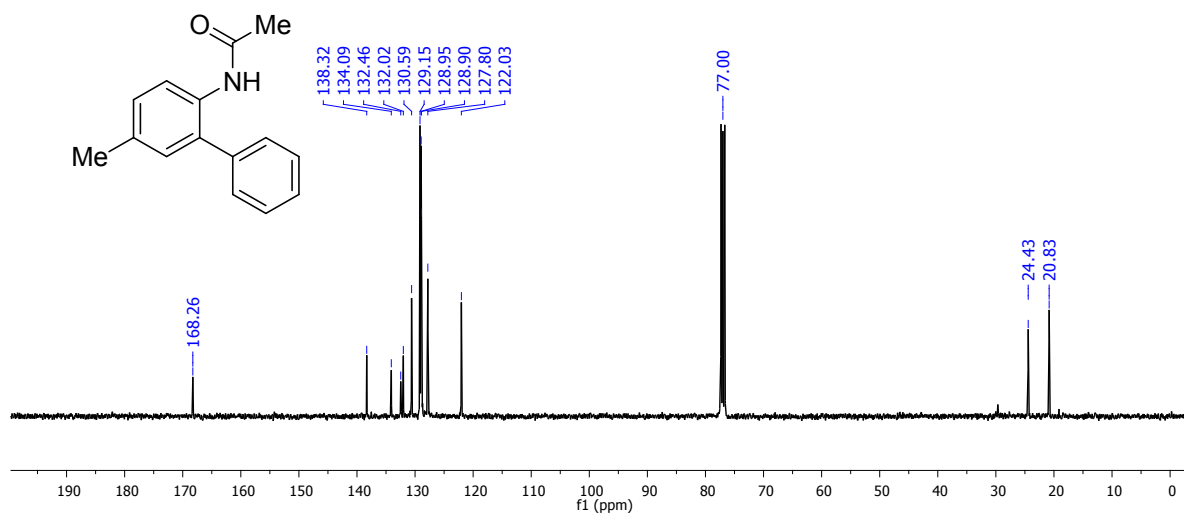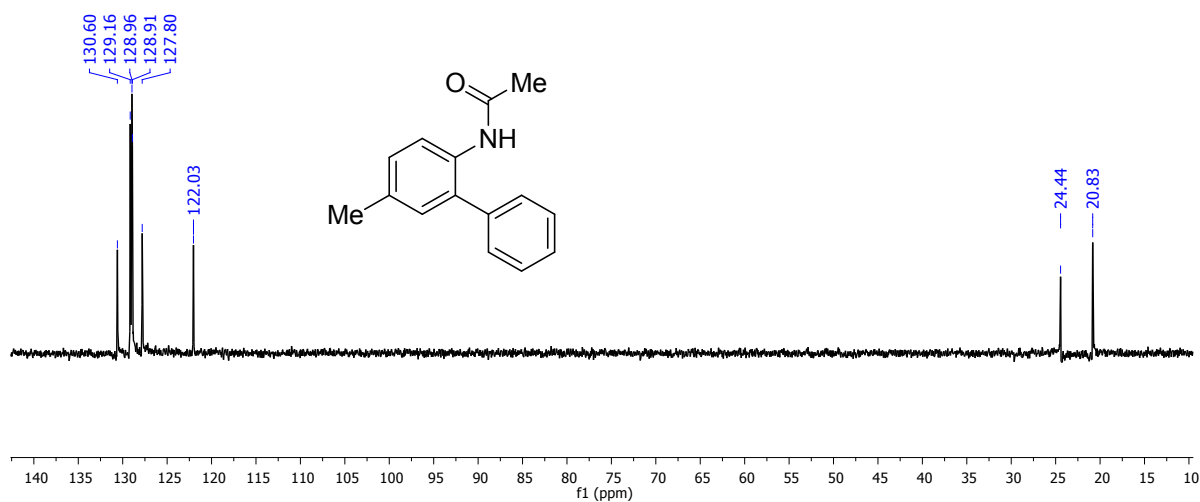

Supplement: c6ra07423e1.pdf [file c6ra07423e1.pdf]
